1 ***Legionella pneumophila* macrophage infectivity potentiator protein appendage domains**  
2 **modulate protein dynamics and inhibitor binding**

3  
4 Wiedemann, C.<sup>1,#</sup>, Whittaker<sup>2,#</sup>, J.J., Pérez Carrillo<sup>1,#</sup>, V.H., Goretzki<sup>1,3</sup>, B., Dajka<sup>4,5</sup>, M., Tebbe<sup>1</sup>, F.,  
5 Harder<sup>1</sup>, J.-M., Krajczyk, P.<sup>6</sup>, R., Joseph<sup>3,4,5</sup>, B., Hausch<sup>6,7</sup>, F., Guskov<sup>2</sup>, A., Hellmich<sup>1,3,\*</sup>, U.A.

6  
7 <sup>1</sup>Faculty of Chemistry and Earth Sciences, Institute of Organic Chemistry and Macromolecular  
8 Chemistry, Friedrich Schiller University Jena, Jena, Germany

9 <sup>2</sup>Groningen Institute for Biomolecular Sciences and Biotechnology, University of Groningen, 9747AG,  
10 Groningen, The Netherlands

11 <sup>3</sup>Center for Biomolecular Magnetic Resonance, Goethe-University, Frankfurt/Main, Germany

12 <sup>4</sup>Institute for Biophysics, Goethe-University, Frankfurt/Main, Germany

13 <sup>5</sup>Department of Physics, Freie Universität Berlin, Germany

14 <sup>6</sup>Department of Chemistry and Biochemistry Clemens-Schöpf-Institute, Technical University  
15 Darmstadt, Darmstadt, Germany

16 <sup>7</sup>Centre for Synthetic Biology, Technical University of Darmstadt, 64283 Darmstadt, Germany.

17  
18  
19 \*Correspondence to UAH: [ute.hellmich@uni-jena.de](mailto:ute.hellmich@uni-jena.de)

20 #These authors contributed equally: C.W., J.J.W., V.H.P.C.

21  
22 ORCIDs

23 CW: 0000-0003-4351-8857

24 JJW: 0000-0001-8966-111X

25 VHPC: 0000-0003-3580-4941

26 BG: 0000-0002-7721-6657

27 BJ: 0000-0003-4968-889X

28 AG: 0000-0003-2340-2216

29 UAH: 0000-0001-7162-285X

30

31

32

33 **Abstract**

34 Macrophage infectivity potentiator (MIP) proteins are widespread in human pathogens including  
35 *Legionella pneumophila*, the causative agent of Legionnaires' disease and protozoans such as  
36 *Trypanosoma cruzi*. All MIP proteins contain a FKBP (FK506 binding protein)-like prolyl-*cis/trans*-  
37 isomerase domain that hence presents an attractive drug target. Some MIPs such as the *Legionella*  
38 protein (*LpMIP*) have additional appendage domains of mostly unknown function. In full-length,  
39 homodimeric *LpMIP*, the N-terminal dimerization domain is linked to the FKBP-like domain via a long,  
40 free-standing stalk helix. Combining X-ray crystallography, NMR and EPR spectroscopy and SAXS,  
41 we elucidated the importance of the stalk helix for protein dynamics and inhibitor binding to the FKBP-  
42 like domain and bidirectional crosstalk between the different protein regions. The first comparison of a  
43 microbial MIP and a human FKBP in complex with the same synthetic inhibitor was made possible by  
44 high-resolution structures of *LpMIP* with a [4.3.1]-aza-bicyclic sulfonamide and provides a basis for  
45 designing pathogen-selective inhibitors. Through stereospecific methylation, the affinity of inhibitors to  
46 to *L. pneumophila* and *T. cruzi* MIP was greatly improved. The resulting X-ray inhibitor-complex  
47 structures of *LpMIP* and TcMIP at 1.49 and 1.34 Å, respectively, provide a starting point for developing  
48 potent inhibitors against MIPs from multiple pathogenic microorganisms.

49

50

51 **Key Words:** virulence factor; protein inhibitor complex; protein dynamics

52

53

## 54 **Introduction**

55 Bacterial parasitism is a wide-spread phenomenon and a serious health concern [1]. Approximately half  
56 of all identified *Legionella* species are associated with human disease, but most human legionellosis are  
57 caused by *Legionella pneumophila* [2]. In their natural fresh water reservoir habitat, these facultative  
58 intracellular gram-negative bacteria infect protozoa, where, protected from harsh environmental  
59 conditions, they find optimal conditions for intracellular replication while benefiting from the nutrient  
60 supply provided by the host [3]. After aspiration of contaminated water from e.g. air conditioners or hot  
61 water cisterns, *L. pneumophila* can also invade alveolar macrophages in the human lung thereby  
62 mimicking the infection of its native amoebal host [2,4,5]. This may result in severe infections such as  
63 Legionnaires' disease or the more benign Pontiac disease [2,4]. Although *Legionella* infections can be  
64 treated with antibiotics, Legionnaires' disease nonetheless has a mortality rate of ~10%, which is likely  
65 even higher in older or immunocompromised patients [6].

66 To promote uptake into a host cell, *L. pneumophila* relies on a number of proteins, including MIP  
67 (Macrophage infectivity potentiator), the first identified *L. pneumophila* virulence factor [7–9].  
68 *Legionella pneumophila* MIP (*LpMIP*) improves the environmental fitness of the bacterium and  
69 facilitates the progression of the early stages of the intracellular infection cycle [9–11]. Genetic deletion  
70 of *LpMIP* results in a reduced intracellular replication rate [9,12].

71 *LpMIP* is a homodimeric protein consisting of an N-terminal dimerization domain, a 65Å long, free-  
72 standing  $\alpha$ -helix, the “stalk helix”, and a C-terminal peptidyl prolyl-*cis/trans*-isomerase (PPIase)  
73 domain [13–15]. Structurally, the PPIase domain belongs to the FK506-binding proteins (FKBPs)  
74 named after their interaction with the natural product macrolide lactone FK506 [16,17]. In FKBPs, an  
75 amphipathic five-stranded  $\beta$ -sheet wraps around an  $\alpha$ -helix thus forming a hydrophobic cavity that binds  
76 substrates and inhibitors [18]. Although the molecular mechanism of *LpMIP* action in infection and its  
77 molecular target(s) remain unclear, it was implicated in host collagen interaction and subsequent  
78 epithelial barrier transmigration [19,20]. Nonetheless, the interaction between *LpMIP* and collagen  
79 could not be mapped in detail, and instead of using classic chemical shift perturbations (CSP), NMR  
80 (nuclear magnetic resonance) spectroscopic PREs (paramagnetic relaxation enhancement) of spin-  
81 labeled collagen peptides had to be used to detect binding to *LpMIP* [19], suggesting weak binding  
82 affinities. In contrast, unambiguous binding site mapping to *LpMIP* has been shown by NMR CSP for  
83 rapamycin, a macrolide which also inhibits human FKBPs [21].

84 MIP proteins are widely expressed in many other human pathogenic microorganisms such as *Chlamydia*  
85 *spp.* [22], *Neisseria gonorrhoeae* [23], the entero-pathogen *Salmonella typhimurium* [24], *Pseudomonas*  
86 *aeruginosa* [25], and intracellular parasitic protozoans such as *Trypanosoma cruzi*, the causative agent  
87 of Chagas disease in South and Central America [26–28]. Hence, the PPIase domains of MIP proteins  
88 are attractive antimicrobial and antiparasitic drug targets [29], however their shallow ligand binding  
89 pocket and similarity to human FKBPs render selective drug design challenging [30,31]. No structures  
90 of a *Legionella* MIP with a synthetic inhibitor are available to date and, in the absence of a high-

91 resolution structure of a microbial MIP and human FKBP MIP in complex with the same synthetic  
92 inhibitor, no side-by-side structural comparison is currently possible.

93 Limited structural information of *LpMIP* is available, with only a crystal structure of the *apo* full-length  
94 homodimer (PDB: 1FD9) [14] and the NMR solution structures of an *apo* and rapamycin-bound  
95 truncation mutant (PDB: 2UZ5, 2VCD) [21]. This construct, *LpMIP*<sup>77-213</sup>, comprises the C-terminal half  
96 of the stalk helix followed by the FKBP-like domain and thus resembles the architecture of the  
97 constitutively monomeric *T. cruzi* MIP protein [26]. Other pathogens such as *Burkholderia*  
98 *pseudomallei*, the bacterium causing melioidosis, express even more minimalistic MIP proteins, lacking  
99 both dimerization domain and the complete stalk helix [32,33].

100 The role of MIP appendage domains, or the consequences of their (partial) absence, remains unclear.  
101 However, homodimeric, full-length MIP from *Legionella pneumophila* presents a unique opportunity  
102 to explore the role of these domains in conformational flexibility and inhibitor binding. Here, we  
103 combined X-ray crystallography, small angle X-ray scattering (SAXS), nuclear magnetic resonance  
104 (NMR) and electron paramagnetic resonance (EPR) spectroscopy to uncover the importance of the  
105 *LpMIP* stalk helix for the protein's functional dynamics and to identify similarities and differences in  
106 inhibitor binding among MIP proteins from various human pathogenic microorganisms and human  
107 FKBP.

108

## 109 **Results**

### 110 **Structural dynamics of full-length *LpMIP* and consequences of inhibitor binding**

111 Comparing our crystal structure of homodimeric full-length *LpMIP* with improved resolution (1.71 Å,  
112 PDB: 8BJC) to the previously published one (2.41 Å, PDB: 1FD9 [14]), revealed a ~18° splay between  
113 the stalk helices in the two structures (Fig. 1A, B). The higher resolution of our electron density map  
114 allowed unambiguous placement and assignment of all stalk helix residues (Fig. 1C, Table S1).  
115 Furthermore, the stalk helix is not involved in crystal contacts suggesting that intrinsic conformational  
116 heterogeneity is responsible for the observed differences between the two structures.

117 The splaying of the stalk helix, which emanates from the mid-helix residues <sup>76</sup>EFNKK<sup>80</sup>, results in a  
118 relative reorientation of the attached FKBP-like domains in the two crystal structures. Nonetheless, both  
119 globular domains align with an RMSD of 0.214 Å (Fig. 1D). The main structural differences between  
120 the two FKBP-like domain structures were observed in the loop between β-strand 4 and 5, resulting in  
121 a different side-chain orientation for residue S189. Minor side-chain rearrangements were also seen for  
122 residues D142, V158 and Y185 in the active site which may however result from the different  
123 resolutions of the two structures.

124

125 Although microbial MIP proteins are promising drug targets, the structural similarity to human FKBP  
126 proteins raises concerns about possible cross-reactivity and off-target effects [34,35]. Naturally  
127 occurring inhibitors such as rapamycin (sirolimus) are large and chemically complex, poorly soluble in

128 water, and have severe immunosuppressive effects limiting their use to treat microbial infection [36].  
129 The comparison of human FKBP and pathogenic microbial MIP proteins bound to a chemically simpler,  
130 synthetic inhibitor molecules could thus present an important step towards improving ligand selectivity.  
131 Recently, an inhibitory effect of [4.3.1] bicyclic sulfonamides on *L. pneumophila* proliferation in  
132 macrophages was demonstrated [34]. One such molecule, (1S,5S,6R)-10-((3,5-  
133 dichlorophenyl)sulfonyl)-5-(hydroxymethyl)-3-(pyridin-2-ylmethyl)-3,10-diazabicyclo [4.3.1]decan-2-  
134 one (JK095, Scheme 1), was co-crystallized with a human FKBP51 domain construct [34]. We thus  
135 deemed this compound a promising candidate for structural studies with MIP proteins from human  
136 pathogens and downstream structural comparison with human FKBP51. Isothermal titration calorimetry  
137 (ITC) confirmed that JK095 indeed interacts with microbial MIP proteins and *LpMIP* variants (see  
138 below) and binds to full-length *LpMIP* with a dissociation constant of  $2.79 \pm 0.4 \mu\text{M}$  (Fig. S1).  
139 We also determined the structure of full-length *LpMIP* in complex with JK095 by X-ray crystallography  
140 at 2.4 Å resolution (PDB: 8BJD) (Fig. 2A). The most notable structural differences between the crystal  
141 structures of *apo* and JK095-bound *LpMIP* is the rearrangement of the loop connecting  $\beta$ -strands  $\beta_4$  and  
142  $\beta_5$  near the stalk helix. Ligand binding to *LpMIP* in solution was probed by titrating  $^2\text{H}$ ,  $^{15}\text{N}$ -labeled  
143 *LpMIP* with JK095 (Fig. 2B, C). Chemical shift perturbations were observed in the FKBP-like domain,  
144 consistent with the binding site identified in the crystal structure. In addition, residues within the FKBP  
145 domain facing the stalk helix, the stalk helix and the dimerization domain show chemical shift  
146 perturbations upon JK095 binding. In the *apo* state, the amide resonances between residues ~57-76 in  
147 the N-terminal half of the *LpMIP* stalk helix show severe line broadening and were thus not visible in  
148 the protein's  $^1\text{H}$ ,  $^{15}\text{N}$ -HSQC NMR spectrum (Fig. 2C, Fig. S2A). Upon addition of JK095, these  
149 resonances become visible in the spectra. This suggests that motions in the  $\mu\text{s}$ -ms timescale, which are  
150 responsible for the peak broadening in the NMR spectrum, are quenched by the ligand whose interaction  
151 with the FKBP-like domain is allosterically communicated into the stalk helix and dimerization domain.  
152 While crystallographic B-factors are generally less well suited to assess dynamic changes, the observed  
153 lower values in the presence of JK095 agree with the NMR spectroscopic results (Fig. 2D, E).  
154  
155 To assess the structural dynamics of *LpMIP* both locally and on a global scale in solution, we combined  
156 NMR relaxation studies with pulsed electron paramagnetic resonance (EPR) spectroscopy and small  
157 angle X-ray scattering (SAXS) (Fig. 3, Fig. S3-S6). NMR relaxation experiments informing on fast, ps-  
158 ns amide bond fluctuations and dynamics overlying the protein's global rotational dynamics show that  
159 *LpMIP* is relatively rigid on the assessed timescale, except for the very N-terminus, the linker between  
160  $\beta_3\text{a}$  and  $\beta_3\text{b}$ , the linker between  $\beta_4$  and  $\beta_5$  and the C-terminus (Fig. S3). In contrast to the influence of  
161 JK095 on the protein dynamics on slower timescales, as was apparent through the changes in line  
162 broadening, fast backbone dynamics were not, or only marginally affected by the inhibitor.  
163

164 The results from EPR spectroscopy and SAXS further provide evidence of the high flexibility of *LpMIP*  
165 in solution (Fig. 3). *LpMIP* does not contain native cysteine residues. Thus, single cysteine mutants in  
166 the middle of the stalk helix (*LpMIP* K80C) and at the C-terminal end of the FKBP-like domain (*LpMIP*  
167 S208C) were introduced and labeled with nitroxide spin labels (Fig. 3A, Fig. S4, S5). Continuous wave  
168 EPR confirmed a satisfactory labeling efficiency at both positions (Fig. 3B).  
169 Pulsed EPR spectroscopy (pulsed electron-electron double resonance (PELDOR, also known as DEER))  
170 was used to determine the distances between the two spin-labeled sites, and the measurements were  
171 compared to simulations of the spin pair distance distributions based on the available crystal structures  
172 (Fig. 3C-E, Table S2). The distance distributions obtained from spin labeled *LpMIP* K80C and S208C  
173 were broader than expected from the crystal structures, indicating that these structures represent only a  
174 subset of conformers in solution. Upon addition of JK095, no significant changes were observed for  
175 *LpMIP* K80C, while for S208C the overall distribution shifted towards shorter distances. This could be  
176 explained e.g. by structural changes of the two FKBP domains moving closer together. Of note, the  
177 related NMR data show that at a molar protein:inhibitor ratio of 1:3 (n/n), the complex is already fully  
178 saturated. The EPR measurements were carried out with a protein:inhibitor ratio of 1:5, indicating that  
179 even when fully occupied, the “closed” conformation is only transiently populated.  
180 Extensive structural dynamics of *LpMIP* in solution are also apparent from SEC-SAXS experiments  
181 (Fig. 3F-I, Fig. S6, Table S3). Here, the *LpMIP* scattering profiles did not match a simulated scattering  
182 curve using the available crystal structure, again suggesting a more complex conformational ensemble  
183 in solution. For a better fit with the experimental SAXS data of *LpMIP* in solution, SREFLEX modeling  
184 was carried out [37] and *LpMIP* structural models with straight and kinked stalk helices were obtained  
185 (Fig. 3H, I). While there were no discernible differences between the *apo* and JK095-bound state in the  
186 *LpMIP* SREFLEX models, which may reflect the loss of JK095 during the size exclusion run (see  
187 below), the SAXS data show high domain flexibility concurrent with the EPR experiments.

188

### 189 **The appendage domains influence *LpMIP* dynamics and stability**

190 Due to their high expression yields and solubility, deletion rather than full-length constructs have  
191 frequently been used for structural studies of both MIP and FKBP inhibitor complexes [21,38].  
192 However, this may not only inadequately reflect the complexity of the therapeutic target, but also  
193 compounds a lack of understanding how the appendage domains affect protein structural dynamics and  
194 inhibitor binding. This question is exacerbated by our observation that ligand binding to the FKBP-like  
195 domains is sensed throughout the entire protein (Fig. 2).

196 In combination with our structural and spectroscopic studies on full-length *LpMIP*, the modular  
197 architecture of *LpMIP* provides a unique opportunity to explore such questions through deletion  
198 mutants. To emulate the structural diversity of MIP proteins from other human-pathogenic microbes,  
199 we generated two shortened *LpMIP* constructs, *LpMIP*<sup>77-213</sup> and *LpMIP*<sup>100-213</sup> (Fig. S7A). *LpMIP*<sup>77-213</sup>,  
200 containing the FKBP-like domain and a bisected stalk helix thus resembling *T. cruzi* MIP [26], is the

201 construct typically used in *in vitro* ligand binding studies [20,21,39].  $LpMIP^{100-213}$ , which consists solely  
202 of the FKBP domain, resembles e.g. *B. pseudomallei* MIP [33]. Both  $LpMIP^{77-213}$  and  $LpMIP^{100-213}$  are  
203 monomeric and structurally intact as seen by size exclusion chromatography (SEC) and circular  
204 dichroism (CD) spectroscopy (Fig. S7B-D). In a fluorescence-based assay, we saw that the melting  
205 temperature ( $T_m$ ) depended greatly on the protein's appendage domains. (Fig. 4A). With  $51.4 \pm 0.3$  °C,  
206 the  $T_m$  of  $LpMIP^{100-213}$  was found to be  $\sim 14$ °C below that of the slightly longer construct  $LpMIP^{77-213}$   
207 ( $64.6 \pm 0.6$  °C) and  $\sim 9$  °C lower than that of full-length  $LpMIP$  ( $60.7 \pm 0.3$  °C) (Fig 4A top). In all three  
208 constructs, addition of JK095 led to an increase in the melting temperature commensurate with protein  
209 stabilization upon inhibitor binding (Fig. 4A bottom). However, this effect was less pronounced for  
210  $LpMIP^{100-213}$  ( $\Delta T_{m(JK095-apo)} = +2.8$  °C) compared to both longer constructs ( $\Delta T_{m(JK095-apo)} = +3.8$  °C). This  
211 may reflect the strongly reduced binding affinity of JK095 to  $LpMIP^{100-213}$  ( $K_d = 45.8 \pm 20$   $\mu$ M) compared  
212 to  $LpMIP^{77-213}$  ( $K_d = 2.5 \pm 0.5$   $\mu$ M) and full-length  $LpMIP$  ( $K_d = 2.8 \pm 0.4$   $\mu$ M) (Fig. S1). The differences  
213 in  $T_m$  and inhibitor binding affinity suggest that the appendage domains, in particular the part of the  
214 stalk helix directly preceding the FKBP domain, play an important role in protein stability and ligand  
215 binding.

216  
217 To investigate the structural crosstalk between appendage and FKBP domains in  $LpMIP$  in more detail,  
218 we used NMR spectroscopy. With the backbone assignments of all three  $LpMIP$  constructs in the *apo*  
219 and JK095-bound states (Fig. S2), the chemical shifts for residues within the FKBP-like domains were  
220 compared (Fig. 4C, D). In the absence of inhibitor, there were only minor differences between full-  
221 length  $LpMIP$  and  $LpMIP^{77-213}$ , except for the very N-terminal residues where the cleavage site is located  
222 (Fig 4C top, orange). Interestingly, differences between the two constructs became slightly more  
223 pronounced in the presence of JK095, particularly for residues in the  $\beta 4/\beta 5$  loop (Fig 4C bottom,  
224 orange).

225 In contrast, the comparison between full-length  $LpMIP$  with  $LpMIP^{100-213}$  already showed strong  
226 chemical shift perturbations in the *apo* state (Fig 4C top, cyan). Most notable were the effects in the  
227 vicinity of residue 160 within the canonical ligand binding site, and between residues 180 and 200,  
228 which are part of the long loop between  $\beta$ -strands 4 and 5 and form an interaction network with the C-  
229 terminal half of the stalk helix (Fig. 4D, E). Furthermore, in the  $^1H$ ,  $^{15}N$ -HSQC spectrum of  $LpMIP^{100-}$   
230  $^{213}$ , no or extremely weak resonances for S115-N117, K146/T147, I159 and R188 were observed, while  
231 these were clearly visible in both longer constructs (Fig. 4D, E, Fig. S2). This suggests that these regions  
232 show altered dynamics in the absence of the stalk helix. However, except for residue I159 as well as  
233 R188 in the  $\beta 4/5$  loop, none of these residues are directly involved in FKBP/stalk helix interactions or  
234 part of the canonical ligand binding site, thus suggesting allosteric effects on the canonical binding site  
235 through the stalk helix. Potentially, such long-range crosstalk could be mediated through a hydrophobic  
236 interaction network between the stalk helix and FKBP-like domain (Fig. 4E).

237 Since the residues across all three full-length *LpMIP* domains showed no significant differences in their  
238 respective backbone dynamics in the ps-ns timescale in  $\{^1\text{H}\}^{15}\text{N}$ -hetNOE experiments between the *apo*  
239 and the JK095-bound states (Fig. S3A), stalk helix removal seems to mostly affect slower,  $\mu\text{s}$ -ms  
240 motions within the FKBP-like domain. In the absence of the stalk helix, increased hetNOE values for  
241 *LpMIP*<sup>77-213</sup> and *LpMIP*<sup>100-213</sup> indicate slightly subdued backbone dynamics of the FKBP-like domain  
242 within the loops connecting  $\beta 3\text{a}/\beta 3\text{b}$  and  $\beta 4/\beta 5$ , both in the absence and presence of JK095 (Fig. S3B,  
243 C).

244

### 245 **Role of the appendage domains for FKBP-like domain inhibitor binding**

246 To gauge a possible structural role of the appendage domains for ligand binding in *LpMIP* as suggested  
247 by our thermostability assays and NMR data (Fig. 4), we determined the crystal structures of *LpMIP*<sup>77-</sup>  
248 <sup>213</sup> (PDB: 8BK5) and *LpMIP*<sup>100-213</sup> (PDB: 8BK6) with JK095 at 2.26 and 1.49 Å resolution, respectively  
249 (Fig. 5A). These complement the crystal structure of full-length *LpMIP* with JK095 (PDB: 8BJD, Fig.  
250 2). The largest structural differences across all three *LpMIP* constructs are observed in the  $\beta 4/\beta 5$  loop,  
251 while the side chains of the active site residues adopted nearly identical orientations. JK095 bound to  
252 *LpMIP*<sup>77-213</sup> adopted a very similar binding stance as seen in the canonical binding pocket of full-length  
253 *LpMIP* (Fig. 5A, B). However, in *LpMIP*<sup>77-213</sup>, the inhibitor's hydroxymethyl group adopted two  
254 orientations while in full-length *LpMIP*, only the orientation facing away from the sidechain of D142  
255 was observed, thereby forgoing the formation of a possible hydrogen bond interaction. Furthermore, the  
256 pyridine ring nitrogen was 2.7 Å away from the Y185 sidechain hydroxyl group in *LpMIP*<sup>77-213</sup>, while  
257 this distance increased to 3.7 Å in full-length *LpMIP*.

258 In contrast to the two longer constructs, the inhibitor binding site in *LpMIP*<sup>100-213</sup> was not clearly defined  
259 in the crystal structure (Fig. S8). To verify the possibility of drastically altered ligand interaction to the  
260 FKBP-like domain in the absence of the appendage domains in solution, we compared the chemical shift  
261 perturbations of the three <sup>15</sup>N-labeled *LpMIP* constructs titrated with JK095 (Fig. 5D, E, Fig. S2A-C).  
262 As expected, the chemical shift changes in full-length *LpMIP* and *LpMIP*<sup>77-213</sup> agree with the binding  
263 site observed in the respective complex crystal structures. In stark contrast, addition of JK095 to  
264 *LpMIP*<sup>100-213</sup> affected a significantly larger number of residues and the chemical shift perturbation pattern  
265 was not restricted to the canonical ligand binding site. Of note, *LpMIP*<sup>100-213</sup> crystallized as a parallel  
266 dimer with the loop between  $\beta 4$  and  $\beta 5$  mediating many of the dimer contacts (PDB: 8BK6, Fig S8).  
267 These loops showed the largest structural differences between the two *LpMIP*<sup>100-213</sup> protomers in the unit  
268 cell and the largest chemical shift changes upon addition of JK095 in the NMR experiments. We thus  
269 wondered whether transient oligomerization could be responsible for the extensive JK095-dependent  
270 chemical shift perturbations in the 12 kDa *LpMIP*<sup>100-213</sup> construct. Under the assumption of isotropic  
271 tumbling, a rotation correlation time  $\tau_c$  of 5.6 ns can be approximated according to the Stokes-Einstein  
272 equation for a spherical globular, monomeric protein of that size at 25 °C (see material and methods for  
273 details). By applying an empirical formula [40], a  $\tau_c$  value of 7.3 ns can be derived for a 12 kDa



274 molecule. Accordingly, neither the overall narrow line widths in the NMR spectra of  $^{15}\text{N}$ -labeled  
275  $LpMIP^{100-213}$  (Fig. S2C), nor the experimentally determined rotation correlation times ( $\tau_c = 6.8 \pm 0.9$  ns  
276 for the *apo* protein,  $\tau_c = 6.4 \pm 0.7$  ns in the presence of JK095) are indicative of inhibitor-induced dimer  
277 formation of  $LpMIP^{100-213}$ . Rather, the extensive NMR chemical shift perturbations in  $LpMIP^{100-213}$  upon  
278 addition of JK095 are likely caused by the non-specific interaction with the inhibitor. This finding  
279 supports the notion that the  $LpMIP$  appendage domains, particularly the C-terminal half of the stalk  
280 helix, play a decisive role in ligand binding to and dynamics within the FKBP domain.

281

### 282 **Comparison of $LpMIP$ and human FKBP51 in complex with the same [4.3.1]-aza-bicyclic** 283 **sulfonamide inhibitor**

284  $LpMIP^{77-213}$  shares 32 % sequence similarity with a construct of human FKBP51 (residues 16-140) that  
285 was recently co-crystallized with JK095 [41]. The two complex crystal structures (PDB IDs: 50BK,  
286 8BK5) align with a backbone RMSD of 0.776Å (Fig. 6A). All residues interacting with JK095 are  
287 conserved between the two proteins (Fig. 6B). A conserved tyrosine residue (Y113/Y185 in  
288 FKBP51/ $LpMIP$ ) responsible for forming a H-bond to the nitrogen of the pyridine or bicycle of the  
289 inhibitor adopted the same orientation in both proteins. The sidechain of residue 159 forms a  
290 hydrophobic lid below the bi-cycle by forming van der Waals contacts with the inhibitor's bicycle  
291 carboxy group. In addition, a barrage of aromatic residues in either protein nestles the bi-cyclic inhibitor  
292 core from below (Fig. 6B).

293 The inhibitor's pyridine group, bi-cyclic core and sulfonamide group align well between the two  
294 proteins, only the di-chlorophenyl moiety is slightly differently tilted. Slight structural variations in the  
295  $\beta$ 3a-strand within the FKBP domain were found between FKBP51 and  $LpMIP$ , namely across residues  
296  $^{67}\text{FDS}^{69}$  and  $^{141}\text{FDS}^{143}$ , respectively. The aromatic residue in this stretch may stabilize the di-  
297 chlorophenyl moiety through T-shaped  $\pi$  stacking. Inhibitor binding may also be affected by the  
298 structural and sequential differences in the loop connecting  $\beta$ 4 and  $\beta$ 5 ( $^{117}\text{GSLPKI}^{122}$  in FKBP51 and  
299  $^{189}\text{SVGGPI}^{194}$  in  $LpMIP$ ). Sitting on top of the di-chlorophenyl moiety of the ligand, the respective  
300 isoleucine residue within this stretch, together with the abovementioned phenylalanine in  $\beta$ 3a, form a  
301 hydrophobic platform against which the di-chlorophenyl ring rests. In the case of FKBP51, the sidechain  
302 of S118 may additionally contact one chloro-substituent and thereby help to orient it. In contrast, the  
303 loop orientation observed in the  $LpMIP^{77-213}$  crystal structure may disfavor interactions of either of the  
304 two chlorine groups with loop sidechains. The structural perturbation of the  $^{67/141}\text{FDS}^{69/143}$  motif in the  
305  $\beta$ 3a-strand also led to slightly different orientations of its central aspartic acid sidechain when comparing  
306 the structures of FKBP51 $^{16-140}$  and  $LpMIP^{77-213}$ . In both cases, the bound JK095 ligand's hydroxymethyl  
307 group adopts two orientations. However, in FKBP51 $^{16-140}$ , neither orientation comes close enough to  
308 form a hydrogen bond with the aspartic acid side chain of D68 (O-O distance 4.0 Å). In contrast, in  
309  $LpMIP^{77-213}$ , in one of the two orientations the distance to the corresponding residue D142 is reduced by

310 0.9 Å compared to FKBP51<sup>16-140</sup>. In the other orientation, the inhibitor hydroxyl group can form  
311 hydrogen bonds with water molecules (see below).

312

### 313 **Methylation leads to improved inhibitor binding to MIPs from different pathogenic** 314 **microorganisms**

315 It was recently observed that the stereospecific introduction of a methyl group at the C<sub>α</sub> position of the  
316 pyridine substituent of bicyclic [4.3.1]-aza-amide inhibitors significantly increased their affinity for  
317 FKBP51 due to displacement of a surface water molecule and the associated entropic gain [41]. JK095  
318 does not carry such a methyl group and in our complex structure with *LpMIP*<sup>77-213</sup>, we observed a  
319 crystallographic water in a similar surface position as the one that originally inspired the inhibitor  
320 methylation studies for human FKBP51 [41] (Fig. 7A). We thus wondered whether inhibitor methylation  
321 may be used to improve the affinity of bicyclic sulfonamides for MIP proteins from pathogenic  
322 microorganisms. To test this hypothesis, we introduced a methyl group into JK095, yielding JK236  
323 (Scheme 1) and determined the co-crystal structure of *LpMIP*<sup>77-213</sup> with JK236 at 1.49 Å resolution  
324 (PDB: 8BJE) (Fig. 7B-D).

325 Overall, the structures of *LpMIP*<sup>77-213</sup> with JK095 and JK236 align with an RMSD of 0.283 Å and show  
326 no notable differences in protein sidechain or inhibitor conformations. Together with NMR chemical  
327 shift perturbation data of <sup>15</sup>N-labeled *LpMIP*<sup>77-213</sup> titrated with JK095 or JK236 (Fig. 7E, F, Fig. S2D),  
328 this confirmed that both ligands interact in a highly similar fashion with the *LpMIP* FKBP-like domain.  
329 Furthermore, pulsed EPR measurements of spin-labeled full-length *LpMIP* K80C and *LpMIP* S208C  
330 showed that JK236 affects the structural ensemble of full-length *LpMIP* in a similar manner as JK095  
331 (Fig. 7G, Fig. S5, S6).

332 Nonetheless, the binding affinity of JK236 to *LpMIP*<sup>77-213</sup> and full-length *LpMIP* was increased by  
333 roughly one order of magnitude for the methylated ( $K_d = 440 \pm 204$  nM and  $391 \pm 48$  nM), compared to  
334 the unmethylated compound ( $2.5 \pm 0.5$  μM and  $2.8 \pm 0.4$  μM) (Fig. S1). In line with a less defined  
335 inhibitor interaction site in *LpMIP*<sup>100-213</sup>, this increase in affinity was much less pronounced for the  
336 shortest *LpMIP* construct ( $K_d = 45.8 \pm 20.4$  μM vs  $5.1 \pm 1.4$  μM for JK095 and JK236, respectively). A  
337 surface water molecule is indeed displaced in the JK236 co-crystal structure compared to the complex  
338 with JK095 (Fig. 7A). While the two inhibitors bound to *LpMIP* superimpose nearly perfectly, the  
339 orientation of the hydroxymethyl group is fixed in JK236 in contrast to the two orientations observed  
340 for JK095. In JK236, the hydroxymethyl group faces away from the sidechain of D142 and instead  
341 exclusively forms a hydrogen bridge with a water molecule. At a resolution of 1.49 Å, the additional  
342 methyl group in JK236 can also be placed unambiguously in the crystal structure and is seen to point  
343 into the solvent where it does not undergo any protein contacts but rather displaces a water molecule  
344 (Fig. 7A). This shows that the methylation of bicyclic ligands to obtain high-affinity binders through  
345 surface water displacement is feasible for *LpMIP* and may constitute a general concept for FKBP as  
346 well as microbial MIPs.

347

348 To gauge whether methylation for improved binding is indeed applicable to MIPs from other human  
349 pathogens including those of eukaryotic origin, we turned to the protozoan *Trypanosoma cruzi*, the  
350 causative agent of Chagas disease. With a free-standing stalk helix and a prototypical FKBP domain,  
351 the *T. cruzi* MIP protein (*TcMIP*) structurally resembles the *LpMIP*<sup>77-213</sup> construct lacking the  
352 dimerization domain and N-terminal half of the stalk helix (Fig. 8).

353 Similar to *LpMIP*, ligand binding to *TcMIP* was significantly improved for the methylated compound  
354 ( $K_d = 150 \pm 68$  nM (JK236) versus  $594 \pm 55$  nM (JK095) (Fig. S1). Our crystal structure of *TcMIP* in  
355 complex with JK236 (PDB: 8BK4) at 1.34 Å resolution confirms the interaction of JK236 with the  
356 canonical binding site in the FKBP-like domain and a highly similar interaction mode as seen for *LpMIP*  
357 (Fig. 8, Fig. S9).

358 The complex structure aligns to the previously published structure of *apo TcMIP* (PDB: 1JVW) [26]  
359 with an RMSD of 0.499 Å (Fig. 8A). The largest differences between the two proteins are seen again in  
360 the loop connecting β-strands 4 and 5, as well as in β-strand 3a. In the *TcMIP apo* structure, multiple  
361 water molecules are found around the substrate binding site which are absent with JK236, but no surface  
362 water molecule is seen in the same position as detected in JK095-bound FKBP51 [34] and *LpMIP*.  
363 However, due to the lack of a complex structure of *TcMIP* with JK095, it is difficult to assess the  
364 consequences of inhibitor methylation on water occupancy in *TcMIP* in detail. Nonetheless, the similar  
365 gain in binding affinity through the introduction of the methyl group into the bi-cyclic inhibitor indicates  
366 a similar mode of action that can be exploited for the development of high-affinity binders against MIP  
367 proteins from various pathogens. The availability of two structures of MIP proteins from highly diverse  
368 pathogenic microorganisms in complex with the same synthetic inhibitor now also provides a unique  
369 opportunity to elucidate the possibility to generate pan-inhibitors.

370

## 371 Discussion

372 The role of MIPs as widespread microbial virulence factors has spurred efforts to develop inhibitors  
373 targeting the MIP FKBP-like domain as the most conserved MIP domain. However, many MIP proteins  
374 contain additional appendage domains of unknown function. This prompted us to investigate the  
375 interdomain crosstalk and dynamics of the homodimeric *Legionella pneumophila* MIP protein as a  
376 representative model system for multi-domain MIPs in more detail.

377 Intrinsic structural flexibility seems to be a hallmark of homodimeric MIP proteins from pathogenic  
378 microorganisms [42]. Not only did we notice significant stalk helix splaying between the two available  
379 crystal structures of full-length *LpMIP* in the absence of a ligand, but a recently published structure of  
380 unliganded, homodimeric *P. aeruginosa* FkbA, which shares the same three-domain architecture,  
381 showed both straight and bent stalk helices in the crystal structure [25]. It has been suggested that  
382 variations in crystal structures are a good proxy for dynamics in solution [43] and in the case of *LpMIP*,  
383 we can support and extend this notion with EPR and NMR spectroscopy as well as SAXS. Our crystal

384 structures provide a glimpse of the protein's dynamics, but the full extent of its domain gymnastics in  
385 solution required a multi-faceted approach.

386 Using NMR spectroscopy, we identified a dynamic hotspot in the central stalk helix of *LpMIP*. This is  
387 also the region that shows extensive kinking in our SAXS SREFLEX models. A difference in "bending"  
388 of the central stalk helix was mentioned previously for a co-crystal of full-length *LpMIP* with FK506  
389 [14], although the corresponding data set has never been submitted to the PDB and thus cannot be  
390 analyzed in detail here. We saw that binding of a bi-cyclic vinylsulfone inhibitor led to a rigidification  
391 of the N-terminal half of the stalk helix. Likewise, Pervushin and colleagues reported that the *E. coli*  
392 FkpA stalk helix rigidifies in the presence of a client protein and led to reduced interdomain mobility  
393 [42].

394 Comparing JK095-bound *LpMIP*<sup>77-213</sup> with the rapamycin-bound protein (Fig. S10), shows the relative  
395 displacement of the ligand enclosing sidechains and indicates that the active site of *LpMIP* displays a  
396 conformational flexibility commensurate with its ability to bind to differently sized ligands. Across all  
397 our structures, the  $\beta$ 4/ $\beta$ 5 loop, which interacts with the stalk helix and may thus serve as a substrate-  
398 selective communication node between stalk and FKBP-like domain, showed the most structural  
399 variations. In contrast to previous observations with rapamycin [21], no significant rigidification of  
400 FKBP-like domain loops on very fast timescales was observed with JK095, while slower dynamics were  
401 quenched throughout the protein upon ligand binding. Different inhibitor molecules could thus  
402 potentially mimic the structural and dynamic consequences of diverse, yet unidentified, native ligands.  
403 Unfortunately, the affinity of collagen peptides, the only known native *LpMIP* substrate to date [19,20],  
404 is too low for detailed structural and dynamic analysis.

405 Furthermore, the addition of bi-cyclic inhibitors led to a population shift but not a full transition to a  
406 "closed" conformation with decreased distances between the FKBP-like domains in our EPR  
407 experiments. Whether this is a general feature of *LpMIP* ligands or unique to the tested inhibitors is  
408 unknown. Future ligand screening could explore whether the ability of ligands to shift the *LpMIP*  
409 conformational ensemble to a closed state correlates with its antimicrobial efficiency.

410 We could also show that the *LpMIP* domains engage in bidirectional crosstalk. Ligand binding at the  
411 FKBP-like domain affected the stalk helix and dimerization domain, and, in turn, stalk helix deletion  
412 reduced protein stability and, surprisingly, led to the loss of a defined ligand binding mode. The  
413 allosteric modulation of ligand binding by the C-terminal half of the stalk helix has interesting  
414 implications for ligand recognition and regulation of MIP proteins from other pathogenic species, such  
415 as *Burkholderia pseudomallei*, which naturally lack a stalk helix and dimerization domain [33].

416 Deletion constructs of MIP proteins have been commonly used to study inhibitor binding. Our data  
417 suggests that a construct retaining the C-terminal half of the stalk helix is suitable for most applications,  
418 but there are nonetheless some differences to consider. The ligand orientation and flexibility in certain

419 inhibitor moieties differ slightly between full-length *LpMIP* and *LpMIP*<sup>77-213</sup>. The increased melting  
420 temperature of *LpMIP*<sup>77-213</sup> may indicate that the stabilization of the FKBP domain by the stalk helix' C-  
421 terminal end is counteracted by the protein's flexibility in the N-terminal half. Complete deletion of the  
422 stalk helix has negative consequences for both protein stability and ligand interactions.

423 Bi-cyclic sulfonamides have antiproliferative effects against *L. pneumophila* and *Chlamydia*  
424 *pneumoniae*, which both express MIP proteins [34]. This suggests that the bicyclic sulfonamide scaffold  
425 is a promising starting point for drug development. Our results on *T. cruzi* MIP suggest that both  
426 prokaryotic and eukaryotic MIP proteins can be targeted with a high-affinity pan-inhibitor, and lessons  
427 from human FKBP's such as site-specific methylation [41] can be exploited to improve inhibitor affinity  
428 for microbial MIPs. However, the structural similarities between MIPs and FKBP's pose challenges,  
429 particularly since FKBP inhibition leads to immunosuppression, the opposite of the desired effect in  
430 fighting severe infections. Here, we could directly compare a microbial MIP with a human FKBP in  
431 complex with the same synthetic ligand for the first time. In a previous NMR study on FKBP51, the  
432 central aromatic residue in the  $\beta$ 3a-strand, was seen to flip in and out of the binding pocket, a process  
433 important for ligand selectivity [44]. The residues stabilizing the "outward" position (FKBP51 K58,  
434 K60 and F129) are not fully conserved in *LpMIP* (T132, R134, F202). Hence ring flipping might be an  
435 important distinguishing feature between the two proteins. Additional structures and dynamic studies of  
436 human FKBP's and microbial MIP's in complex with the same ligands, possibly with other molecular  
437 scaffold architectures, may be helpful in making further progress in this area.

438 In summary, we found that in *Legionella pneumophila* MIP, the stalk helix decisively modulates ligand-  
439 binding behavior of the FKBP-like domain, the most conserved domain across all MIP proteins. This,  
440 together with the high intrinsic flexibility of MIP proteins and the ability to engage with structurally  
441 diverse ligands, suggests that MIP appendage domains can be used to fine-tune substrate responses and  
442 suggest they play a contextual role in the survival and replication of pathogenic microorganisms.

443

## 444 **Material and Methods**

### 445 **Cloning, protein expression and purification**

446 Genes coding for *Legionella pneumophila* *LpMIP*<sup>1-213</sup>, *LpMIP*<sup>77-213</sup>, *LpMIP*<sup>100-213</sup> and *Trypanosoma cruzi*  
447 TcMIP with a His<sub>6</sub>-tag were obtained from GenScript (Piscataway Township, NJ, USA) and cloned into  
448 a pET11a vector. Single cysteine mutants for EPR spectroscopy were introduced at positions K80C and  
449 S208C in *LpMIP*<sup>1-213</sup> via site directed mutagenesis using the following primer pairs:

450 K80C forward: 5'-CCGCGGAGTTTAACAAGTGCGCGGATGAAAACAAGG-3'

451 K80C reverse 5'- ACCTTGTTTTTCATCCGCGCACTTGTTAAACTCCGCG-3'

452 S208C forward 5'- TAAGATTCACCTGATCTGCGTGAAGAAAAGCAG - 3'

453 S208C reverse 5'- CTGCTTTTCTTCACGCAGATCAGGTGAATCTTA - 3

454 Freshly transformed *E. coli*. BL21 gold (DE3) cells were grown at 37 °C to an OD<sub>600</sub> of 0.6 and then  
455 induced with 1 mM IPTG and grown overnight at 20 °C. <sup>2</sup>H, <sup>15</sup>N-labeled *LpMIP*<sup>1-213</sup> was obtained by  
456 growing cells in commercially available Silantes OD2 *E. coli* medium (Silantes GmbH, Munich,  
457 Germany). <sup>13</sup>C, <sup>15</sup>N-labeled *LpMIP*<sup>77-213</sup> and *LpMIP*<sup>100-213</sup> were obtained by growing cells in minimal  
458 medium with <sup>15</sup>N-NH<sub>4</sub>Cl and <sup>13</sup>C-glucose as the sole nitrogen and carbon sources. Cells were harvested  
459 by centrifugation (5000×g, 10 min, 4 °C). The cell pellet was frozen in liquid nitrogen and stored at  
460 - 20 °C until further use.

461 For purification of *LpMIP*<sup>1-213</sup> and *LpMIP*<sup>77-213</sup>, the cell pellet was dissolved in lysis buffer (20 mM Tris  
462 pH 8, 20mM Imidazole pH 8, 300 mM NaCl, 0.1 % Tx100, 1 mM DTT, 1 mM benzamidine, 1 mM  
463 PMSF, DNase, RNase and lysozyme). Cells were disrupted passing them three times through a  
464 microfluidizer (Maximator) at 18,000 psi. Membranes and cell debris were pelleted at 48,380xg, 30 min,  
465 4 °C and the supernatant was loaded onto a NiNTA column (Qiagen, Hilden, Germany) previously  
466 equilibrated with washing buffer (20 mM Tris pH 8, 300 mM NaCl and 20 mM imidazole). After  
467 washing with 10 CV (column volumes) of washing buffer, the protein of interest was eluted with 5 CV  
468 of elution buffer (20 mM Tris pH 8, 300 mM NaCl and 500 mM imidazole pH 8). Proteins were dialyzed  
469 overnight at 4 °C in 20 mM Tris pH 8, 300 mM NaCl in the presence of His-tagged TEV protease (1:20  
470 mol/mol) to cleave the His-tag from the MIP constructs.  
471 Dialyzed protein was then loaded onto a fresh NiNTA column. The flow through was collected and the  
472 column was washed with 4 CV of washing buffer to obtain the maximum amount of tag-free MIP  
473 protein. For the purification of *LpMIP*<sup>100-213</sup> the same protocol was applied, with all buffers adjusted to  
474 pH 7. After concentration, the proteins were loaded on a size exclusion column (HiLoad 16/600  
475 Superdex 200 pg, Cytiva, Freiburg, Germany) equilibrated with size exclusion buffer (20 mM Tris pH 7,  
476 150 mM NaCl for *LpMIP*<sup>77-213</sup> and *LpMIP*<sup>100-213</sup> and 50 mM Tris pH 7, 150 mM NaCl for *LpMIP*<sup>1-213</sup>).  
477 The fractions containing pure protein were pooled and sample purity was verified by SDS-PAGE.

478

### 479 **Crystallization, data collection and structure determination of *LpMIP* inhibitor complexes**

480 Following size exclusion chromatography, each of the proteins were kept in a solution of 20 mM Tris  
481 and 150 mM NaCl at pH 7.0 and were concentrated to 10 mg/mL using a 10,000 MWCO concentrator.  
482 Each protein was mixed with the crystallization buffer in a ratio of 2:1, and, where appropriate, with a  
483 1:5 molar ratio of inhibitor. Inhibitors were synthesized as previously described [34,41]. All crystals  
484 were obtained using sitting drop *vapor* diffusion via custom screens with the following conditions:  
485 *LpMIP*<sup>1-213</sup> 20 % (w/v) PEG 6000, 500 mM zinc acetate dihydrate, 100 mM MES, pH 6.0. *LpMIP*<sup>1-</sup>  
486 <sup>213</sup>JK095 15 % (w/v) PEG 6000, 500 mM zinc acetate dihydrate, 100 mM MES, pH 6.5. *LpMIP*<sup>100-213</sup>  
487 JK095 20 % (w/v) PEG 8000, 500 mM zinc acetate dihydrate, 100 mM MES, pH 5.8. *LpMIP*<sup>77-213</sup> JK095  
488 20 % (v/v) 2-propanol, 0.2 M sodium citrate tribasic dihydrate, 0.1 M HEPES, pH 7.5. *LpMIP*<sup>77-213</sup> JK236  
489 18 % (w/v) PEG 8000, 0.2 M zinc acetate, 0.1 M sodium cacodylate, pH 6.5. TcMIP JK236 30 % (v/v)  
490 MPD, 0.2 M ammonium acetate, 0.1 M sodium citrate, pH 5.6. Crystals were briefly soaked in 30 % (v/v)  
491 glycerol for cryo-protection and subsequently flash-frozen in liquid nitrogen in preparation for  
492 diffraction experiments at synchrotron energy. Data were collected at beam line ID23-1 and ID30A-3  
493 (ESRF, Grenoble).

494 Crystals of the MIP series diffracted between 1.3 and 2.4 Å resolution (Table 1). Data were processed  
495 with XDS [45] and structures were solved by Molecular Replacement with Phaser [46] using previously  
496 published models of MIPs (PDB ID: 1FD9, 1JVW). Manual rebuilding was performed with COOT [47]  
497 and refinement with Refmac [48]. The refined models were deposited into the PDB repository with the  
498 following IDs: 8BJC, 8BJD, 8BJE, 8BK4, 8BK5, 8BK6. Images were prepared using Pymol  
499 (Schrödinger, LLC), CorelDRAW (Corel), UCSF ChimeraX [49] and Blender (Blender Foundation).

500

#### 501 **Analytical Size-exclusion chromatography (SEC)**

502 20 μM of purified *LpMIP* constructs (*LpMIP*<sup>1-213</sup>, *LpMIP*<sup>77-213</sup> or *LpMIP*<sup>100-213</sup>) in 20mM Tris pH 7, 150  
503 mM NaCl were used. For the *apo* state protein, a final concentration 0.02% DMSO was added. A 5-fold  
504 molar excess of JK095 in DMSO was added (0.02% final DMSO concentration). Samples were injected  
505 on a Superdex 200 Increase 10/300 GL (Cytiva) column via an NGC chromatography system (BioRad).

506

#### 507 **Circular Dichroism (CD) spectroscopy**

508 CD measurements were conducted on a Jasco J-1500 CD spectrometer (Jasco, Gross-Umstadt,  
509 Germany) with 1 mm quartz cuvettes using 3.5 μM protein in 5 mM Tris pH 7 and 2.5 mM NaCl.  
510 Spectra were recorded at 25 °C in a spectral range between 190 – 260 nm with 1 nm scanning intervals,  
511 1.00 nm bandwidth and 50 nm/min scanning speed. All spectra were obtained from the automatic  
512 averaging of five measurements.

513

#### 514 **Isothermal Titration Calorimetry (ITC)**

515 Experiments were performed in an isothermal titration calorimeter (Microcal ITC200 - Malvern  
516 Panalytical) at 25 °C with a reference power of 11 μCal/sec, an initial delay of 120 seconds and a stirring

517 speed of 750 rpm. Protein concentration within the cell was between 20 and 40  $\mu\text{M}$  and ligand  
518 concentration in the syringe was between 0.5 and 1 mM. Protein and inhibitors (JK095 and JK236) were  
519 prepared in 20 mM Tris pH 8, NaCl 150 mM and 5% DMSO. For each titration, 20 injections (spacing  
520 between injections was 180 sec, duration was 0.4 sec) of 2  $\mu\text{L}$  inhibitor solution were carried out. The  
521 curves were fitted using Origin.

522

### 523 NMR spectroscopy

524 All NMR spectra were obtained at 298. K on 600 MHz Bruker AvanceIII HD or Neo NMR spectrometer  
525 systems equipped with 5-mm triple resonance cryo-probes. The spectrometers were locked on  $\text{D}_2\text{O}$ . The  
526  $^1\text{H}$  chemical shifts of the  $^2\text{H}$ ,  $^{15}\text{N}$ -labelled  $Lp\text{MIP}^{1-213}$ ,  $^{13}\text{C}$ ,  $^{15}\text{N}$ -labelled  $Lp\text{MIP}^{77-213}$  and  $^{13}\text{C}$ ,  $^{15}\text{N}$ -labelled  
527  $Lp\text{MIP}^{100-213}$  were directly referenced to 3-(trimethylsilyl)propane-1-sulfonate (DSS).  $^{13}\text{C}$  and  $^{15}\text{N}$   
528 chemical shifts were referenced indirectly to the  $^1\text{H}$  DSS standard by the magnetogyric ratio [50].  
529  $Lp\text{MIP}^{1-213}$  was measured in 50mM Tris HCl pH 7, 150 mM NaCl, 0.1 mM DSS, 0.05 %  $\text{NaN}_3$  and  
530 10 %  $\text{D}_2\text{O}$ . Sample conditions for  $Lp\text{MIP}^{77-213}$  and  $Lp\text{MIP}^{100-213}$  were the same except 20 mM Tris HCl  
531 pH 7 was used. Final protein concentrations were in the range of 100-150  $\mu\text{M}$ . All spectra were  
532 processed using Bruker Topspin 4.1.1 and analyzed using CcpNmr Analysis [51] v2.5 (within the  
533 NMRbox virtual environment [52]).

534 The previously published NMR backbone assignments of  $Lp\text{MIP}^{1-213}$  (BMRB entry 7021) and  $Lp\text{MIP}^{77-}$   
535  $^{213}$  (BMRB entry 6334)<sup>37,38</sup> were transferred to our spectra and verified using band-selective excitation  
536 short-transient (BEST) transverse relaxation-optimized spectroscopy (TROSY)-based HNCA or  
537 HNCACB experiments under our buffer conditions. In contrast, the assignment of  $Lp\text{MIP}^{100-213}$  had to  
538 be determined *de novo* by a set of BEST-TROSY-based HN(CA)CO, HNCA and HN(CO)CA, as the  
539  $^1\text{H}$ ,  $^{15}\text{N}$ -HSCQ spectrum of this construct differed significantly from the resonances of the FKBP domain  
540 in both  $Lp\text{MIP}^{77-213}$  and full-length  $Lp\text{MIP}$ .

541 Standard NMR pulse sequences implemented in Bruker Topspin library were employed to obtain  $R_1$ ,  $R_2$   
542 and  $^{15}\text{N}$ ,  $\{^1\text{H}\}$ -NOE values. For  $Lp\text{MIP}^{1-213}$ , TROSY-sampling pulse sequences were used to ensure high  
543 data quality. Longitudinal and transverse  $^{15}\text{N}$  relaxation rates ( $R_1$  and  $R_2$ ) of the  $^{15}\text{N}$ - $^1\text{H}$  bond vectors of  
544 backbone amide groups were extracted from signal intensities ( $I$ ) by a single exponential fit according  
545 to equation 1:

$$546 \quad I = I_0 e^{-(tR_{1/2})} \quad (1)$$

547 In  $R_1$  relaxation experiments the variable relaxation delay  $t$  was set to 1000 ms, 20 ms, 1500 ms, 60 ms,  
548 3000 ms, 100 ms, 800 ms, 200 ms, 40 ms, 400 ms, 80 ms and 600 ms. In all  $R_2$  relaxation experiments  
549 the variable loop count was set to 36, 15, 2, 12, 4, 22, 8, 28, 6, 10, 1 and 18. The length of one loop  
550 count was 16.96 ms. In the TROSY-based  $R_2$  experiments the loop count length was 8.48 ms. The  
551 variable relaxation delay  $t$  in  $R_2$  experiments is calculated by length of one loop count times the number  
552 of loop counts. The inter-scan delay for the  $R_1$  and  $R_2$  experiments was set to 4 s.



553 The  $^{15}\text{N}\{-^1\text{H}\}$  steady-state nuclear Overhauser effect measurements ( $^{15}\text{N}\{^1\text{H}\}\text{-NOE}$ ) were obtained from  
554 separate 2D  $^1\text{H}\text{-}^{15}\text{N}$  spectra acquired with and without continuous  $^1\text{H}$  saturation, respectively. The  
555  $^{15}\text{N}\{^1\text{H}\}\text{-NOE}$  values were determined by taking the ratio of peak volumes from the two spectra,  
556  $^{15}\text{N}\{^1\text{H}\}\text{-NOE} = I_{\text{sat}}/I_0$ , where  $I_{\text{sat}}$  and  $I_0$  are the peak intensities with and without  $^1\text{H}$  saturation. The  
557 saturation period was approximately  $5/R_1$  of the amide protons.

558

559 The averaged  $^1\text{H}$  and  $^{15}\text{N}$  weighted chemical shift perturbations (CSP) observed in  $^1\text{H}$ ,  $^{15}\text{N}\text{-HSQC}$   
560 spectra were calculated according to equation 2 [53]:

$$561 \quad \text{CSP} = \sqrt{0.5 * [\Delta\delta_{\text{H}}^2 + (0.15 * \Delta\delta_{\text{N}})^2]} \quad (2)$$

562 Here,  $\Delta\delta_{\text{H}}$  is the  $^1\text{H}$  chemical shift difference,  $\Delta\delta_{\text{N}}$  is the  $^{15}\text{N}$  chemical shift difference, and CSP is the  
563 averaged  $^1\text{H}$  and  $^{15}\text{N}$  weighted chemical shift difference in ppm.

564

565 The oligomerization state of a protein can be estimated from the rotational correlation time ( $\tau_c$ ), the time  
566 it takes the protein to rotate by one radian under Brownian rotation diffusion. Under the assumption of  
567 a spherical globular protein and isotropic motion,  $\tau_c$  (in ns) can be roughly approximated from the  
568 Stokes-Einstein equation (3):

$$569 \quad \tau_c = \frac{4\pi\eta r_{\text{eff}}^3}{3k_{\text{B}}T} \quad (3)$$

570 where  $\eta$  is viscosity (0.89 mPa\*s for water at 298.2 K),  $k_{\text{B}}$  the Boltzmann constant and  $T$  the absolute  
571 temperature. The effective hydrodynamic radius  $r_{\text{eff}}$  can directly be correlated with molecular weight  
572 ( $M_w$ ):

$$573 \quad r_{\text{eff}} = \sqrt[3]{\frac{3M_w}{4\pi\rho N_A}} + r_h \quad (4)$$

574 where  $\rho$  is the average protein density (1.37 g/cm<sup>3</sup>) and  $N_A$  the Avogadro constant. For our calculations  
575 we used hydration layer radius of 3.2 Å.

576 Based on studies from the Northeast Structural Genomics Consortium an empirical formula could be  
577 derived for direct correlation of  $M_w$  (in Da) and  $\tau_c$  (in ns) for proteins in the range of 5-25 kD [40]:

$$578 \quad \tau_c = 0.00062 * M_w - 0.15 \quad (5)$$

579 The rotational correlation time is directly accessible from the ratio of  $^{15}\text{N}$   $R_1$  and  $R_2$  relaxation rates of  
580 backbone amide measured at a  $^{15}\text{N}$  resonance frequency ( $\nu_N$ ) assuming slow isotropic overall motion  
581 [40,54] (equation 6):

$$582 \quad \tau_c = \frac{1}{4\pi\nu_N} \sqrt{\frac{6R_2}{R_1} - 7} \quad (6)$$

### 583 **Electron Paramagnetic Resonance (EPR) spectroscopy sample preparation**

584 For spin labelling, Ni-NTA-column-bound single cysteine mutants of  $Lp\text{MIP}^{1-213}$  were incubated  
585 overnight at 4 °C using a 15-fold excess of 3-(2-Iodoacetamido)-2,2,5,5-tetramethyl-1-pyrrolidinyloxy  
586 (IPSL) after the washing steps and then purified as described above. Following the IPSL-labelling

587 procedure, 4  $\mu\text{L}$  of  $\text{D}_8$ -glycerol or water was added to a 12  $\mu\text{L}$  of  $Lp\text{MIP}$  sample, mixed thoroughly and  
588 gently transferred into a sample tube. The samples for continuous wave EPR were directly measured in  
589 a 25  $\mu\text{L}$  micropipettes (BRAND, Germany) with a 0.64-mm diameter at room temperature. Samples for  
590 pulsed EPR were flash frozen in liquid nitrogen in a 1.6 mm quartz EPR tube (Suprasil, Wilmad  
591 LabGlass) and stored at  $-80^\circ\text{C}$ .

592

### 593 **Continuous-wave EPR measurements**

594 Continuous-wave (CW) EPR measurements were performed at X-band frequency (9.4 GHz) on a Bruker  
595 EMXnano Benchtop Spectrometer at room temperature in a 25  $\mu\text{L}$  micropipette (BRAND, Germany)  
596 with a 0.64 mm diameter. The spectra were acquired with 100 kHz modulation frequency, 0.15 mT  
597 modulation amplitude, 0.6 - 2 mW microwave power, 5.12 ms time constant, 22.5 ms conversion time,  
598 and 18 mT sweep width.

599

### 600 **Pulsed EPR measurements**

601 Pulsed EPR (PELDOR/DEER) experiments were performed on a Bruker Eleksys E580 Q-Band  
602 (33.7 GHz) Pulsed ESR spectrometer equipped with an arbitrary waveform generator (SpinJet AWG,  
603 Bruker), a 50 W solid state amplifier, a continuous-flow helium cryostat, and a temperature control  
604 system (Oxford Instruments). Measurements were performed at 50 K using a 10 – 20  $\mu\text{L}$  frozen sample  
605 containing 15 – 20% glycerol- $d_8$  in a 1.6 mm quartz ESR tubes (Suprasil, Wilmad LabGlass). For  
606 measuring the phase memory times ( $T_M$ ), a 48 ns  $\pi/2$ - $\tau$ - $\pi$  Gaussian pulse sequence was used with a  
607 two-step phase cycling, while  $\tau$  was increased in 4 ns steps. PELDOR measurements were performed  
608 with a Bruker EN5107D2 dielectric resonator at 50 K using a dead-time free four-pulse sequence and a  
609 16-step phase cycling ( $x$  [x] [xp]x) [55,56]. A 38 ns Gaussian pulse (full width at half maximum  
610 (FWHM) of 16.1 ns) was used as the pump pulse with a 48 ns (FWHM of 20.4 ns) Gaussian observer  
611 pulses. The pump pulse was set to the maximum of the echo-detected field swept spectrum and the  
612 observer pulses were set at 80 MHz lower. The deuterium modulations were averaged by increasing the  
613 first interpulse delay by 16 ns for 8 steps. The five-pulse PELDOR/DEER experiments were performed  
614 according to the pulse sequence  $\pi/2_{\text{obs}} - (\tau/2 - t_0) - \pi_{\text{pump}} - t_0 - \pi_{\text{obs}} - t' - \pi_{\text{pump}} - (\tau - t' + \delta) - \pi_{\text{obs}} - (\tau_2$   
615  $+ \delta)$ . Experiments were performed at 50 K using 48 ns Gaussian observer pulses and a 16-step phase  
616 cycling ( $xx_p$  [x] [x\_p]x). A 36 ns pump pulse was used at  $\nu_{\text{obs}} + 80$  MHz. Nuclear modulation averaging  
617 was performed analogous to 4-pulse PELDOR (16 ns shift in 8 steps) with a corresponding shift of the  
618 standing pump pulse. The four-pulse data analysis was performed using Tikhonov regularization as  
619 implemented in the MATLAB-based DeerAnalysis2019 package [57]. The background arising from  
620 intermolecular interactions were removed from the primary data  $V(t)/V(0)$  and the resulting form factors  
621  $F(t)/F(0)$  were fitted with a model-free approach to distance distributions. For an error estimation of the  
622 probability distribution, the distances for different background functions were determined through  
623 gradually changing the time window and the dimensionality for the spin distribution (see Supplementary

624 Table S2). The data was additionally analyzed to predict the distances (and the background) in a user-  
625 independent manner using the deep neural network (DEERNet) analysis, which is hosted by the  
626 DeerAnalysis2019 package [58,59]. Samples for which both 4-pulse and 5-pulse data are available were  
627 globally analyzed using the Python based DeerLab program [60]. Distance distributions for the  
628 structures (PDB 8BJC and 1FD9) were simulated using a rotamer library approach using the MATLAB-  
629 based MMM2022.2 software package [58].

630

### 631 **Small angle X-ray scattering (SAXS)**

632 SAXS experiments were carried out at the EMBL-P12 bioSAXS beam line, DESY [61]. SEC-SAXS  
633 data were collected [62],  $I(q)$  vs  $q$ , where  $q = 4\pi\sin\theta/\lambda$  is the scattering angle and  $\lambda$  the X-ray wavelength  
634 (0.124 nm; 10 keV). Data collection was carried out at 20 °C using a Superdex200 Increase 5/150  
635 analytical SEC column (GE Healthcare) equilibrated in the appropriate buffers (see Table S3) at flow  
636 rates of 0.3 mL/min. Automated sample injection and data collection were controlled using the  
637 *BECQUEREL* beam line control software [63]. The SAXS intensities were measured from the  
638 continuously-flowing column eluent as a continuous series of 0.25 s individual X-ray exposures, using  
639 a Pilatus 6M 2D-area detector for a total of one column volume (ca. 600-3000 frames in total, see Table  
640 S3). The radial averaging of the data one-dimensional  $I(q)$  vs  $q$  profiles was carried out with the  
641 SASFLOW pipeline incorporating RADAVER from the ATSAS 2.8 software suite [64]. The individual  
642 frames obtained for each SEC-SAXS run were processed using CHROMIXS [65]. Briefly, individual  
643 SAXS data frames were selected across the respective sample SEC-elution peaks and appropriate solute-  
644 free buffer regions of the elution profile were identified, averaged and then subtracted to obtain  
645 individual background-subtracted sample data frames. The radius of gyration ( $R_g$ ) of each data frame  
646 was assessed in CHROMIXS and frames with equivalent  $R_g$  were scaled and subsequently averaged to  
647 produce the final one-dimensional and background-corrected SAXS profiles. Only those scaled  
648 individual SAXS data frames with a consistent  $R_g$  through the SEC-elution peak that were also evaluated  
649 as statistically similar through the measured  $q$ -range were included to produce the final SAXS profiles.  
650 Corresponding UV traces were not measured; the column eluate was directly moved to the P12 sample  
651 exposure unit after the SEC column, forgoing UV absorption measurements, to minimize unwanted  
652 band-broadening of the sample. All SAXS data-data comparisons and data-model fits were assessed  
653 using the reduced  $\chi^2$  test and the Correlation Map, or CORMAP,  $p$ -value [66]. Fits within the  $\chi^2$  range  
654 of 0.9–1.1 or having CORMAP  $p$ -values higher than the significance threshold cutoff of  $\alpha = 0.01$  are  
655 considered excellent, i.e., absence of systematic differences between the data-data or data-model fits at  
656 the significance threshold.

657 Primary SAXS data were analysed using PRIMUS as well as additional modules from the ATSAS 3.0.1  
658 software suite [67].  $R_g$  and the forward scattering at zero angle,  $I(0)$  were estimated via the Guinier  
659 approximation [68] ( $\ln(I(q))$  vs.  $q^2$  for  $qR_g < 1.3$ ) and the real-space pair distance distribution function,  
660 or  $p(r)$  profile (calculated from the indirect inverse Fourier transformation of the data, thus also yielding

661 estimates of the maximum particle dimension,  $D_{max}$ , Porod volume,  $V_p$ , shape classification, and  
662 concentration-independent molecular weight [69–71]). Dimensionless Kratky plot representations of the  
663 SAXS data ( $qR_g^2(I(q)/I(0))$  vs.  $qR_g$ ) were generated as previously described [72]. All collected SAXS  
664 data are reported in Tables S3.

665

666 **Rigid body modeling** – Rigid-body normal mode analysis of *LpMIP* was performed using the program  
667 SREFLEX [73] using the *LpMIP apo* and JK095-bound X-ray crystal structures (PDB: 1FD9, 8BJD and  
668 8BJC) as templates. CRY SOL was used to assess data-model fits [74].

669

#### 670 **Thermal stability assay**

671 10  $\mu$ g of purified *LpMIP* constructs in 20mM Tris pH 7, 150 mM NaCl were incubated with a final  
672 concentration of 0.02% DMSO or a 5-fold molar excess of JK095 in DMSO (0.02% final concentration).  
673 2.5  $\mu$ L of a 50x SYPRO Orange (Merck) stock was added to each sample directly before measurement  
674 of the melting temperature in a 96-well plate on a QuantStudio 1 Real-Time PCR System reader (Thermo  
675 Fisher) with a temperature increase of 0.05  $^{\circ}$ C/min. The fluorescence of SYPRO Orange was measured  
676 using the filter calibrated for SYBR GREEN with an excitation filter of  $470 \pm 15$  nm and an emission  
677 filter of  $520 \pm 15$  nm.

678

#### 679 **Data availability**

680 The coordinates of the refined models and structure factors have been deposited into the PDB repository:  
681 8BJC for *LpMIP*<sup>1-213</sup>, 8BJD for *LpMIP*<sup>1-213</sup>JK095, 8BK6 for *LpMIP*<sup>100-213</sup> JK095, 8BK5 for *LpMIP*<sup>77-213</sup>  
682 JK095, 8BJE for *LpMIP*<sup>77-213</sup> JK236 and 8BK4 for TcMIP JK236. The NMR backbone assignment of  
683 *LpMIP*<sup>100-213</sup> has been deposited in the BioMagResBank ([www.bmrb.io](http://www.bmrb.io)) under the accession number  
684 51861. The NMR backbone assignments for full-length *LpMIP*<sup>1-213</sup> and *LpMIP*<sup>77-213</sup> are available from  
685 the BMRB under the accession numbers 7021 and 6334, respectively [38,75]. SAXS data for full-length  
686 *LpMIP* have been deposited in the SASBDB under the accession numbers SASXXX, SASXXX and  
687 SASXXX.

688

#### 689 **Conflict of interest**

690 The authors have no conflict of interest to declare.

691

#### 692 **Author contributions**

693 Sample preparation: CW, VHPC, FT, BG; Biochemistry: VHCP, FT, BG; X-ray crystallography: JJW,  
694 BG, AG; NMR spectroscopy: CW, VHPC, FT, BG; EPR spectroscopy: VHPC, MD, BJ; SAXS: CW,  
695 FT, BG, JMH; Inhibitor synthesis: PK; Conceptualization: UAH; Funding acquisition: FH, AG, UAH;  
696 Supervision: BG, FH, AG, UAH; Paper writing – first draft: UAH; Paper writing – review and editing:

697 CW, JJW, BG, BJ, AG, UAH; visualization: CW, JJW, VHPC, MD, BG, UAH. All authors read and  
698 approved the final version of the manuscript.

699

## 700 **Acknowledgments**

701 We thank Sarah-Ana Mitrovic, Hannah Niederlechner, Sabine Häfner and Dania Rose-Sperling for  
702 technical assistance and Robin Deutscher for support with synthesis. BG acknowledges a PhD  
703 fellowship by the Max Planck Graduate Center (MPGC). Access to beamline P12, DESY, Hamburg was  
704 made available via iNEXT-ERIC (BAG proposal #SAXS-1106 (to UAH)). We are grateful to Shibom  
705 Basu and Montserrat Soler Lopez at the ESRF for providing assistance at beamlines ID23-2 and ID30A-  
706 3 (BAG proposals #MX-2268 and #MX-2407 to AG). We thank Andreas Schlundt for organizational  
707 support with SAXS measurements. We thank the Centre of Biomolecular Magnetic Resonance (BMRZ)  
708 at the Goethe University Frankfurt funded by the state of Hesse and the Jena School for Microbial  
709 Communication (JSMC) for support. Funded by the Federal Ministry of Education and Research  
710 (BMBF) project iMIP (16GW0211 to FH, 16GW0214 to UAH). BJ acknowledges financial support  
711 through the Emmy Noether program (JO 1428/1-1) and a large equipment funding (438280639) from  
712 the Deutsche Forschungsgemeinschaft (DFG). Supported by the DFG under Germany's Excellence  
713 Strategy - EXC 2051 - Project ID 390713860 and the collaborative research cluster SFB1127/3  
714 ChemBioSys— Project ID 239748522 (to UAH). UAH acknowledges an instrumentation grant by the  
715 REACT-EU EFRE Thuringia (Recovery assistance for cohesion and the territories of Europe, European  
716 Fonds for Regional Development, Thuringia) initiative of the European Union.

## 717 References

- 718 [1] J.E. Martyn, L. Gomez-Valero, C. Buchrieser, The evolution and role of eukaryotic-like domains  
719 in environmental intracellular bacteria: the battle with a eukaryotic cell, *FEMS Microbiology*  
720 *Reviews*. 46 (2022) fuac012. <https://doi.org/10.1093/femsre/fuac012>.
- 721 [2] I.G. Gonçalves, L.C. Simões, M. Simões, *Legionella pneumophila*, *Trends in Microbiology*. 29  
722 (2021) 860–861. <https://doi.org/10.1016/j.tim.2021.04.005>.
- 723 [3] C.M. Anand, A.R. Skinner, A. Malic, J.B. Kurtz, Interaction of *L. pneumophila* and a free living  
724 amoeba (*Acanthamoeba palestinensis*), *J Hyg (Lond)*. 91 (1983) 167–178.
- 725 [4] D. Chauhan, S.R. Shames, Pathogenicity and Virulence of *Legionella*: Intracellular replication  
726 and host response, *Virulence*. 12 (n.d.) 1122–1144.  
727 <https://doi.org/10.1080/21505594.2021.1903199>.
- 728 [5] M.F. Brady, V. Sundareshan, *Legionnaires' Disease*, in: *StatPearls*, StatPearls Publishing,  
729 Treasure Island (FL), 2022. <http://www.ncbi.nlm.nih.gov/books/NBK430807/> (accessed  
730 November 20, 2022).
- 731 [6] D. Viasus, V. Gaia, C. Manzur-Barbur, J. Carratalà, *Legionnaires' Disease: Update on Diagnosis*  
732 *and Treatment*, *Infect Dis Ther*. 11 (2022) 973–986. [https://doi.org/10.1007/s40121-022-  
733 \*00635-7\*.](https://doi.org/10.1007/s40121-022-00635-7)
- 734 [7] J. Hacker, M. Ott, E. Wintermeyer, B. Ludwig, G. Fischer, Analysis of virulence factors of  
735 *Legionella pneumophila*, *Zentralbl Bakteriologie*. 278 (1993) 348–358.  
736 [https://doi.org/10.1016/s0934-8840\(11\)80851-0](https://doi.org/10.1016/s0934-8840(11)80851-0).
- 737 [8] N.C. Engleberg, C. Carter, D.R. Weber, N.P. Cianciotto, B.I. Eisenstein, DNA sequence of mip, a  
738 *Legionella pneumophila* gene associated with macrophage infectivity, *Infect Immun*. 57 (1989)  
739 1263–1270. <https://doi.org/10.1128/iai.57.4.1263-1270.1989>.
- 740 [9] N.P. Cianciotto, B.I. Eisenstein, C.H. Mody, G.B. Toews, N.C. Engleberg, A *Legionella*  
741 *pneumophila* gene encoding a species-specific surface protein potentiates initiation of  
742 intracellular infection, *Infect Immun*. 57 (1989) 1255–1262.  
743 <https://doi.org/10.1128/iai.57.4.1255-1262.1989>.
- 744 [10] N.P. Cianciotto, B.I. Eisenstein, C.H. Mody, N.C. Engleberg, A mutation in the mip gene results in  
745 an attenuation of *Legionella pneumophila* virulence, *J Infect Dis*. 162 (1990) 121–126.  
746 <https://doi.org/10.1093/infdis/162.1.121>.
- 747 [11] J. Rasch, C.M. Ünal, A. Klages, Ü. Karsli, N. Heinsohn, R.M.H.J. Brouwer, M. Richter, A.  
748 Dellmann, M. Steinert, Peptidyl-Prolyl-cis/trans-Isomerases Mip and PpiB of *Legionella*  
749 *pneumophila* Contribute to Surface Translocation, Growth at Suboptimal Temperature, and  
750 Infection, *Infect Immun*. 87 (2018) e00939-17. <https://doi.org/10.1128/IAI.00939-17>.
- 751 [12] N.P. Cianciotto, B.S. Fields, *Legionella pneumophila* mip gene potentiates intracellular infection  
752 of protozoa and human macrophages, *Proc Natl Acad Sci U S A*. 89 (1992) 5188–5191.  
753 <https://doi.org/10.1073/pnas.89.11.5188>.
- 754 [13] B. Schmidt, J. Rahfeld, A. Schierhorn, B. Ludwig, J. Hacker, G. Fischer, A homodimer represents  
755 an active species of the peptidyl-prolyl cis/trans isomerase FKBP25mem from *Legionella*  
756 *pneumophila*, *FEBS Lett*. 352 (1994) 185–190. [https://doi.org/10.1016/0014-5793\(94\)00970-8](https://doi.org/10.1016/0014-5793(94)00970-8).
- 757 [14] A. Riboldi-Tunnicliffe, B. König, S. Jessen, M.S. Weiss, J. Rahfeld, J. Hacker, G. Fischer, R.  
758 Hilgenfeld, Crystal structure of Mip, a prolyl isomerase from *Legionella pneumophila*, *Nat Struct*  
759 *Mol Biol*. 8 (2001) 779–783. <https://doi.org/10.1038/nsb0901-779>.
- 760 [15] G. Fischer, H. Bang, B. Ludwig, K. Mann, J. Hacker, Mip protein of *Legionella pneumophila*  
761 exhibits peptidyl-prolyl-cis/trans isomerase (PPIase) activity, *Molecular Microbiology*. 6 (1992)  
762 1375–1383. <https://doi.org/10.1111/j.1365-2958.1992.tb00858.x>.
- 763 [16] M.W. Harding, A. Galat, D.E. Uehling, S.L. Schreiber, A receptor for the immuno-suppressant  
764 FK506 is a cis–trans peptidyl-prolyl isomerase, *Nature*. 341 (1989) 758–760.  
765 <https://doi.org/10.1038/341758a0>.
- 766 [17] J.J. Siekierka, S.H.Y. Hung, M. Poe, C.S. Lin, N.H. Sigal, A cytosolic binding protein for the  
767 immunosuppressant FK506 has peptidyl-prolyl isomerase activity but is distinct from  
768 cyclophilin, *Nature*. 341 (1989) 755–757. <https://doi.org/10.1038/341755a0>.

- 769 [18] C.B. Kang, Y. Hong, S. Dhe-Paganon, H.S. Yoon, FKBP family proteins: immunophilins with  
770 versatile biological functions, *Neurosignals*. 16 (2008) 318–325.  
771 <https://doi.org/10.1159/000123041>.
- 772 [19] C. Ünal, K.F. Schwedhelm, A. Thiele, M. Weiwad, K. Schweimer, F. Frese, G. Fischer, J. Hacker, C.  
773 Faber, M. Steinert, Collagen IV-derived peptide binds hydrophobic cavity of Legionella  
774 pneumophila Mip and interferes with bacterial epithelial transmigration, *Cellular Microbiology*.  
775 13 (2011) 1558–1572. <https://doi.org/10.1111/j.1462-5822.2011.01641.x>.
- 776 [20] C. Wagner, A.S. Khan, T. Kamphausen, B. Schmausser, C. Ünal, U. Lorenz, G. Fischer, J. Hacker,  
777 M. Steinert, Collagen binding protein Mip enables Legionella pneumophila to transmigrate  
778 through a barrier of NCI-H292 lung epithelial cells and extracellular matrix, *Cellular*  
779 *Microbiology*. 9 (2007) 450–462. <https://doi.org/10.1111/j.1462-5822.2006.00802.x>.
- 780 [21] A. Ceymann, M. Horstmann, P. Ehses, K. Schweimer, A.-K. Paschke, M. Steinert, C. Faber,  
781 Solution structure of the Legionella pneumophila Mip-rapamycin complex, *BMC Struct Biol*. 8  
782 (2008) 17. <https://doi.org/10.1186/1472-6807-8-17>.
- 783 [22] A.G. Lundemose, S. Birkelund, S.J. Fey, P.M. Larsen, G. Christiansen, Chlamydia trachomatis  
784 contains a protein similar to the Legionella pneumophila mip gene product, *Mol Microbiol*. 5  
785 (1991) 109–115. <https://doi.org/10.1111/j.1365-2958.1991.tb01831.x>.
- 786 [23] R. Leuzzi, L. Serino, M. Scarselli, S. Savino, M.R. Fontana, E. Monaci, A. Taddei, G. Fischer, R.  
787 Rappuoli, M. Pizza, Ng-MIP, a surface-exposed lipoprotein of Neisseria gonorrhoeae, has a  
788 peptidyl-prolyl cis/trans isomerase (PPIase) activity and is involved in persistence in  
789 macrophages, *Mol Microbiol*. 58 (2005) 669–681. [https://doi.org/10.1111/j.1365-](https://doi.org/10.1111/j.1365-2958.2005.04859.x)  
790 [2958.2005.04859.x](https://doi.org/10.1111/j.1365-2958.2005.04859.x).
- 791 [24] S.M. Horne, T.J. Kottom, L.K. Nolan, K.D. Young, Decreased intracellular survival of an fkpA  
792 mutant of Salmonella typhimurium Copenhagen, *Infect Immun*. 65 (1997) 806–810.  
793 <https://doi.org/10.1128/iai.65.2.806-810.1997>.
- 794 [25] Q. Huang, J. Yang, C. Li, Y. Song, Y. Zhu, N. Zhao, X. Mou, X. Tang, G. Luo, A. Tong, B. Sun, H.  
795 Tang, H. Li, L. Bai, R. Bao, Structural characterization of PaFkbA: A periplasmic chaperone from  
796 Pseudomonas aeruginosa, *Computational and Structural Biotechnology Journal*. 19 (2021)  
797 2460–2467. <https://doi.org/10.1016/j.csbj.2021.04.045>.
- 798 [26] P.J.B. Pereira, M.C. Vega, E. González-Rey, R. Fernández-Carazo, S. Macedo-Ribeiro, F.X. Gomis-  
799 Rüth, A. González, M. Coll, Trypanosoma cruzi macrophage infectivity potentiator has a  
800 rotamase core and a highly exposed  $\alpha$ -helix, *EMBO Reports*. 3 (2002) 88–94.  
801 <https://doi.org/10.1093/embo-reports/kvf009>.
- 802 [27] A. Moro, F. Ruiz-Cabello, A. Fernández-Cano, R.P. Stock, A. González, Secretion by Trypanosoma  
803 cruzi of a peptidyl-prolyl cis-trans isomerase involved in cell infection., *EMBO J*. 14 (1995) 2483–  
804 2490.
- 805 [28] L.M.D. Magalhães, K.J. Gollob, B. Zingales, W.O. Dutra, Pathogen diversity, immunity, and the  
806 fate of infections: lessons learned from Trypanosoma cruzi human-host interactions, *Lancet*  
807 *Microbe*. 3 (2022) e711–e722. [https://doi.org/10.1016/S2666-5247\(21\)00265-2](https://doi.org/10.1016/S2666-5247(21)00265-2).
- 808 [29] C.M. Ünal, M. Steinert, Microbial peptidyl-prolyl cis/trans isomerases (PPIases): virulence  
809 factors and potential alternative drug targets, *Microbiol Mol Biol Rev*. 78 (2014) 544–571.  
810 <https://doi.org/10.1128/MMBR.00015-14>.
- 811 [30] J.M. Kolos, A.M. Voll, M. Bauder, F. Hausch, FKBP Ligands-Where We Are and Where to Go?,  
812 *Front Pharmacol*. 9 (2018) 1425. <https://doi.org/10.3389/fphar.2018.01425>.
- 813 [31] N.J. Scheuplein, N.M. Bzdyl, E.A. Kibble, T. Lohr, U. Holzgrabe, M. Sarkar-Tyson, Targeting  
814 Protein Folding: A Novel Approach for the Treatment of Pathogenic Bacteria, *J Med Chem*. 63  
815 (2020) 13355–13388. <https://doi.org/10.1021/acs.jmedchem.0c00911>.
- 816 [32] I.H. Norville, N.J. Harmer, S.V. Harding, G. Fischer, K.E. Keith, K.A. Brown, M. Sarkar-Tyson, R.W.  
817 Titball, A Burkholderia pseudomallei Macrophage Infectivity Potentiator-Like Protein Has  
818 Rapamycin-Inhibitable Peptidylprolyl Isomerase Activity and Pleiotropic Effects on Virulence  $\nabla$ ,  
819 *Infect Immun*. 79 (2011) 4299–4307. <https://doi.org/10.1128/IAI.00134-11>.

- 820 [33] I.H. Norville, K. O’Shea, M. Sarkar-Tyson, S. Zheng, R.W. Titball, G. Varani, N.J. Harmer, The  
821 structure of a *Burkholderia pseudomallei* immunophilin–inhibitor complex reveals new  
822 approaches to antimicrobial development, *Biochemical Journal*. 437 (2011) 413–422.  
823 <https://doi.org/10.1042/BJ20110345>.
- 824 [34] S. Pomplun, C. Sippel, A. Hähle, D. Tay, K. Shima, A. Klages, C.M. Ünal, B. Rieß, H.T. Toh, G.  
825 Hansen, H.S. Yoon, A. Bracher, P. Preiser, J. Rupp, M. Steinert, F. Hausch, *Chemogenomic*  
826 *Profiling of Human and Microbial FK506-Binding Proteins*, *J Med Chem*. 61 (2018) 3660–3673.  
827 <https://doi.org/10.1021/acs.jmedchem.8b00137>.
- 828 [35] C.M. Ünal, M. Steinert, FKBP in bacterial infections, *Biochim Biophys Acta*. 1850 (2015) 2096–  
829 2102. <https://doi.org/10.1016/j.bbagen.2014.12.018>.
- 830 [36] S. Khan, S. Khan, S. Baboota, J. Ali, *Immunosuppressive drug therapy – biopharmaceutical*  
831 *challenges and remedies*, *Expert Opinion on Drug Delivery*. 12 (2015) 1333–1349.  
832 <https://doi.org/10.1517/17425247.2015.1005072>.
- 833 [37] M.V. Petoukhov, D.I. Svergun, *Global Rigid Body Modeling of Macromolecular Complexes*  
834 *against Small-Angle Scattering Data*, *Biophysical Journal*. 89 (2005) 1237–1250.  
835 <https://doi.org/10.1529/biophysj.105.064154>.
- 836 [38] M. Horstmann, T. Kamphausen, K. Schweimer, M. Steinert, J. Hacker, A. Haase, P. Rösch, G.  
837 Schweimer, C. Faber, *Letter to the Editor: 1H, 13C, 15N backbone and sidechain resonance*  
838 *assignment of Mip(77–213) the PPIase domain of the Legionella pneumophila Mip protein*, *J*  
839 *Biomol NMR*. 31 (2005) 77–78. <https://doi.org/10.1007/s10858-004-6041-6>.
- 840 [39] R. Deutscher, S. Karagöz, P. Purder, J. Kolos, C. Meyners, W. Sugiarto, P. Krajczyk, F. Tebbe, T.  
841 Geiger, C. Ünal, U. Hellmich, M. Steinert, F. Hausch, [4.3.1] Bicyclic FKBP ligands inhibit  
842 *Legionella pneumophila* infection by *LpMip*-dependent and *LpMip* independent mechanisms,  
843 (2023). <https://doi.org/10.26434/chemrxiv-2023-vfssm>.
- 844 [40] P. Rossi, G.V.T. Swapna, Y.J. Huang, J.M. Aramini, C. Anklin, K. Conover, K. Hamilton, R. Xiao,  
845 T.B. Acton, A. Ertekin, J.K. Everett, G.T. Montelione, *A microscale protein NMR sample*  
846 *screening pipeline*, *J Biomol NMR*. 46 (2010) 11–22. <https://doi.org/10.1007/s10858-009-9386->  
847 [z](https://doi.org/10.1007/s10858-009-9386-z).
- 848 [41] J.M. Kolos, S. Pomplun, S. Jung, B. Rieß, P.L. Purder, A.M. Voll, S. Merz, M. Gnatzy, T.M. Geiger,  
849 I. Quist-Løkken, J. Jatzlau, P. Knaus, T. Holien, A. Bracher, C. Meyners, P. Czodrowski, V.  
850 Krewald, F. Hausch, *Picomolar FKBP inhibitors enabled by a single water-displacing methyl*  
851 *group in bicyclic [4.3.1] aza-amides*, *Chem. Sci*. 12 (2021) 14758–14765.  
852 <https://doi.org/10.1039/D1SC04638A>.
- 853 [42] K. Hu, V. Galius, K. Pervushin, *Structural Plasticity of Peptidyl–Prolyl Isomerase sFkpA Is a Key to*  
854 *Its Chaperone Function As Revealed by Solution NMR*, *Biochemistry*. 45 (2006) 11983–11991.  
855 <https://doi.org/10.1021/bi0607913>.
- 856 [43] R.B. Best, K. Lindorff-Larsen, M.A. DePristo, M. Vendruscolo, *Relation between native*  
857 *ensembles and experimental structures of proteins*, *Proceedings of the National Academy of*  
858 *Sciences*. 103 (2006) 10901–10906. <https://doi.org/10.1073/pnas.0511156103>.
- 859 [44] P.K.A. Jagtap, S. Asami, C. Sippel, V.R.I. Kaila, F. Hausch, M. Sattler, *Selective Inhibitors of*  
860 *FKBP51 Employ Conformational Selection of Dynamic Invisible States*, *Angewandte Chemie*  
861 *International Edition*. 58 (2019) 9429–9433. <https://doi.org/10.1002/anie.201902994>.
- 862 [45] W. Kabsch, *Integration, scaling, space-group assignment and post-refinement*, *Acta Cryst D*. 66  
863 (2010) 133–144. <https://doi.org/10.1107/S0907444909047374>.
- 864 [46] A.J. McCoy, R.W. Grosse-Kunstleve, P.D. Adams, M.D. Winn, L.C. Storoni, R.J. Read, *Phaser*  
865 *crystallographic software*, *J Appl Cryst*. 40 (2007) 658–674.  
866 <https://doi.org/10.1107/S0021889807021206>.
- 867 [47] P. Emsley, B. Lohkamp, W.G. Scott, K. Cowtan, *Features and development of Coot*, *Acta Cryst D*.  
868 66 (2010) 486–501. <https://doi.org/10.1107/S0907444910007493>.
- 869 [48] G.N. Murshudov, A.A. Vagin, E.J. Dodson, *Refinement of Macromolecular Structures by the*  
870 *Maximum-Likelihood Method*, *Acta Cryst D*. 53 (1997) 240–255.  
871 <https://doi.org/10.1107/S0907444996012255>.



- 872 [49] E.F. Pettersen, T.D. Goddard, C.C. Huang, E.C. Meng, G.S. Couch, T.I. Croll, J.H. Morris, T.E.  
873 Ferrin, UCSF ChimeraX: Structure visualization for researchers, educators, and developers,  
874 Protein Science. 30 (2021) 70–82. <https://doi.org/10.1002/pro.3943>.
- 875 [50] D.S. Wishart, C.G. Bigam, J. Yao, F. Abildgaard, H.J. Dyson, E. Oldfield, J.L. Markley, B.D. Sykes,  
876 <sup>1</sup>H, <sup>13</sup>C and <sup>15</sup>N chemical shift referencing in biomolecular NMR, J Biomol NMR. 6 (1995) 135–  
877 140. <https://doi.org/10.1007/BF00211777>.
- 878 [51] W.F. Vranken, W. Boucher, T.J. Stevens, R.H. Fogh, A. Pajon, M. Llinas, E.L. Ulrich, J.L. Markley,  
879 J. Ionides, E.D. Laue, The CCPN data model for NMR spectroscopy: Development of a software  
880 pipeline, Proteins: Structure, Function, and Bioinformatics. 59 (2005) 687–696.  
881 <https://doi.org/10.1002/prot.20449>.
- 882 [52] M.W. Maciejewski, A.D. Schuyler, M.R. Gryk, I.I. Moraru, P.R. Romero, E.L. Ulrich, H.R.  
883 Eghbalnia, M. Livny, F. Delaglio, J.C. Hoch, NMRbox: A Resource for Biomolecular NMR  
884 Computation, Biophysical Journal. 112 (2017) 1529–1534.  
885 <https://doi.org/10.1016/j.bpj.2017.03.011>.
- 886 [53] M.P. Williamson, Using chemical shift perturbation to characterise ligand binding, Prog Nucl  
887 Magn Reson Spectrosc. 73 (2013) 1–16. <https://doi.org/10.1016/j.pnmrs.2013.02.001>.
- 888 [54] L.E. Kay, D.A. Torchia, A. Bax, Backbone dynamics of proteins as studied by nitrogen-15 inverse  
889 detected heteronuclear NMR spectroscopy: application to staphylococcal nuclease,  
890 Biochemistry. 28 (1989) 8972–8979. <https://doi.org/10.1021/bi00449a003>.
- 891 [55] M. Pannier, S. Veit, A. Godt, G. Jeschke, H.W. Spiess, Dead-Time Free Measurement of Dipole–  
892 Dipole Interactions between Electron Spins, Journal of Magnetic Resonance. 142 (2000) 331–  
893 340. <https://doi.org/10.1006/jmre.1999.1944>.
- 894 [56] C.E. Tait, S. Stoll, Coherent pump pulses in Double Electron Electron Resonance spectroscopy,  
895 Phys. Chem. Chem. Phys. 18 (2016) 18470–18485. <https://doi.org/10.1039/C6CP03555H>.
- 896 [57] G. Jeschke, V. Chechik, P. Ionita, A. Godt, H. Zimmermann, J. Banham, C.R. Timmel, D. Hilger, H.  
897 Jung, DeerAnalysis2006—a comprehensive software package for analyzing pulsed ELDOR data,  
898 Appl. Magn. Reson. 30 (2006) 473–498. <https://doi.org/10.1007/BF03166213>.
- 899 [58] Y. Polyhach, E. Bordignon, G. Jeschke, Rotamer libraries of spin labelled cysteines for protein  
900 studies, Phys. Chem. Chem. Phys. 13 (2011) 2356–2366. <https://doi.org/10.1039/C0CP01865A>.
- 901 [59] S.G. Worswick, J.A. Spencer, G. Jeschke, I. Kuprov, Deep neural network processing of DEER  
902 data, Science Advances. 4 (2018) eaat5218. <https://doi.org/10.1126/sciadv.aat5218>.
- 903 [60] L. Fábregas Ibáñez, G. Jeschke, S. Stoll, DeerLab: a comprehensive software package for  
904 analyzing dipolar electron paramagnetic resonance spectroscopy data, Magnetic Resonance. 1  
905 (2020) 209–224. <https://doi.org/10.5194/mr-1-209-2020>.
- 906 [61] C.E. Blanchet, A. Spilotros, F. Schwemmer, M.A. Graewert, A. Kikhney, C.M. Jeffries, D. Franke,  
907 D. Mark, R. Zengerle, F. Cipriani, S. Fiedler, M. Roessle, D.I. Svergun, Versatile sample  
908 environments and automation for biological solution X-ray scattering experiments at the P12  
909 beamline (PETRA III, DESY), J Appl Cryst. 48 (2015) 431–443.  
910 <https://doi.org/10.1107/S160057671500254X>.
- 911 [62] M.A. Graewert, S. Da Vela, T.W. Gräwert, D.S. Molodenskiy, C.E. Blanchet, D.I. Svergun, C.M.  
912 Jeffries, Adding Size Exclusion Chromatography (SEC) and Light Scattering (LS) Devices to Obtain  
913 High-Quality Small Angle X-Ray Scattering (SAXS) Data, Crystals. 10 (2020) 975.  
914 <https://doi.org/10.3390/cryst10110975>.
- 915 [63] N.R. Hajizadeh, D. Franke, D.I. Svergun, Integrated beamline control and data acquisition for  
916 small-angle X-ray scattering at the P12 BioSAXS beamline at PETRAIII storage ring DESY, J  
917 Synchrotron Rad. 25 (2018) 906–914. <https://doi.org/10.1107/S1600577518005398>.
- 918 [64] D. Franke, A.G. Kikhney, D.I. Svergun, Automated acquisition and analysis of small angle X-ray  
919 scattering data, Nuclear Instruments and Methods in Physics Research Section A: Accelerators,  
920 Spectrometers, Detectors and Associated Equipment. 689 (2012) 52–59.  
921 <https://doi.org/10.1016/j.nima.2012.06.008>.

- 922 [65] A. Panjkovich, D.I. Svergun, CHROMIXS: automatic and interactive analysis of chromatography-  
923 coupled small-angle X-ray scattering data, *Bioinformatics*. 34 (2018) 1944–1946.  
924 <https://doi.org/10.1093/bioinformatics/btx846>.
- 925 [66] D. Franke, C.M. Jeffries, D.I. Svergun, Correlation Map, a goodness-of-fit test for one-  
926 dimensional X-ray scattering spectra, *Nat Methods*. 12 (2015) 419–422.  
927 <https://doi.org/10.1038/nmeth.3358>.
- 928 [67] K. Manalastas-Cantos, P.V. Konarev, N.R. Hajizadeh, A.G. Kikhney, M.V. Petoukhov, D.S.  
929 Molodenskiy, A. Panjkovich, H.D.T. Mertens, A. Gruzinov, C. Borges, C.M. Jeffries, D.I. Svergun,  
930 D. Franke, ATSAS 3.0: expanded functionality and new tools for small-angle scattering data  
931 analysis, *J Appl Cryst*. 54 (2021) 343–355. <https://doi.org/10.1107/S1600576720013412>.
- 932 [68] A. Guinier, La diffraction des rayons X aux très petits angles : application à l'étude de  
933 phénomènes ultramicroscopiques, *Ann. Phys.* 11 (1939) 161–237.  
934 <https://doi.org/10.1051/anphys/193911120161>.
- 935 [69] D.I. Svergun, Determination of the regularization parameter in indirect-transform methods  
936 using perceptual criteria, *J Appl Cryst*. 25 (1992) 495–503.  
937 <https://doi.org/10.1107/S0021889892001663>.
- 938 [70] N.R. Hajizadeh, D. Franke, C.M. Jeffries, D.I. Svergun, Consensus Bayesian assessment of protein  
939 molecular mass from solution X-ray scattering data, *Sci Rep*. 8 (2018) 7204.  
940 <https://doi.org/10.1038/s41598-018-25355-2>.
- 941 [71] D. Franke, C.M. Jeffries, D.I. Svergun, Machine Learning Methods for X-Ray Scattering Data  
942 Analysis from Biomacromolecular Solutions, *Biophysical Journal*. 114 (2018) 2485–2492.  
943 <https://doi.org/10.1016/j.bpj.2018.04.018>.
- 944 [72] V. Receveur-Brechot, D. Durand, How random are intrinsically disordered proteins? A small  
945 angle scattering perspective, *Curr Protein Pept Sci*. 13 (2012) 55–75.  
946 <https://doi.org/10.2174/138920312799277901>.
- 947 [73] A. Panjkovich, D.I. Svergun, Deciphering conformational transitions of proteins by small angle X-  
948 ray scattering and normal mode analysis, *Phys. Chem. Chem. Phys.* 18 (2016) 5707–5719.  
949 <https://doi.org/10.1039/C5CP04540A>.
- 950 [74] D. Svergun, C. Barberato, M.H.J. Koch, CRY SOL – a Program to Evaluate X-ray Solution  
951 Scattering of Biological Macromolecules from Atomic Coordinates, *J Appl Cryst*. 28 (1995) 768–  
952 773. <https://doi.org/10.1107/S0021889895007047>.
- 953 [75] M. Horstmann, P. Ehses, K. Schweimer, M. Steinert, T. Kamphausen, G. Fischer, J. Hacker, P.  
954 Rösch, C. Faber, Domain Motions of the Mip Protein from *Legionella pneumophila*,  
955 *Biochemistry*. 45 (2006) 12303–12311. <https://doi.org/10.1021/bi060818i>.
- 956

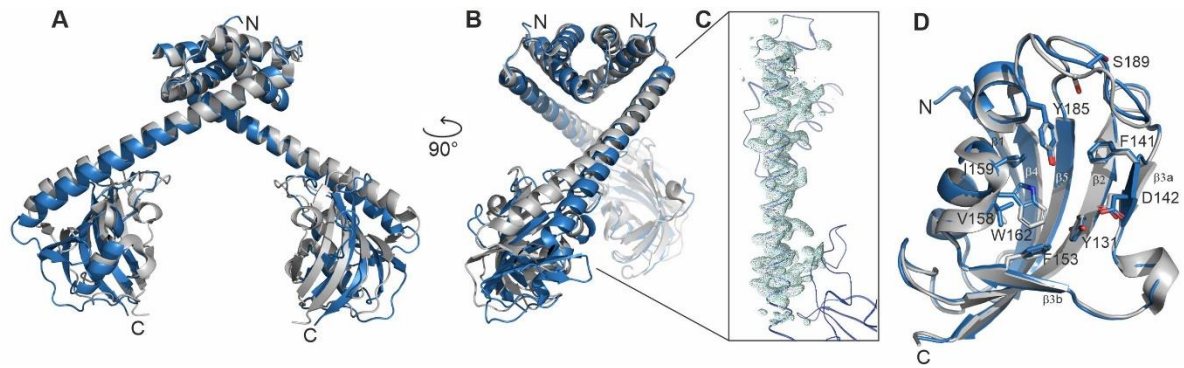

**Fig. 1: Comparison of full-length *LpMIP* structures reveal stalk helix splaying.**

(A, B) Overlay of the N-terminal dimerization domains of the two currently available *LpMIP*<sup>1-213</sup> structures (PDB: 1FD9 at 2.41 Å, grey; PDB: 8BJC at 1.71 Å, blue) shows ~18° stalk helix splaying.

(C) Importantly, the stalk helix backbone of our newly determined *LpMIP* structure (blue) can be unambiguously placed in the 2Fo–Fc electron density map, shown here as a light blue mesh at 3σ. For clarity, only the density map for the stalk helix backbone is shown.

(D) Overlay of the FKBP-like domains from the two *LpMIP* structures. Residues surrounding the active site are shown as sticks, β-strands are labeled.

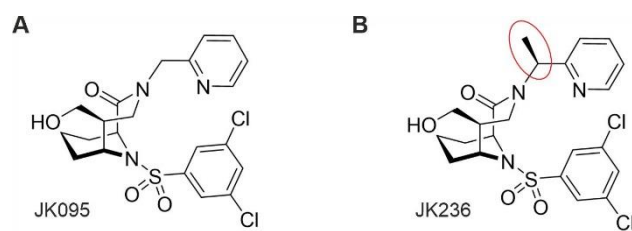

**Scheme 1: [4.3.1]-aza-bicyclic sulfonamide inhibitors used in this study.** JK095 (A) and JK236 (B) differ by the insertion of a stereospecific methyl group in the pyridine linker.

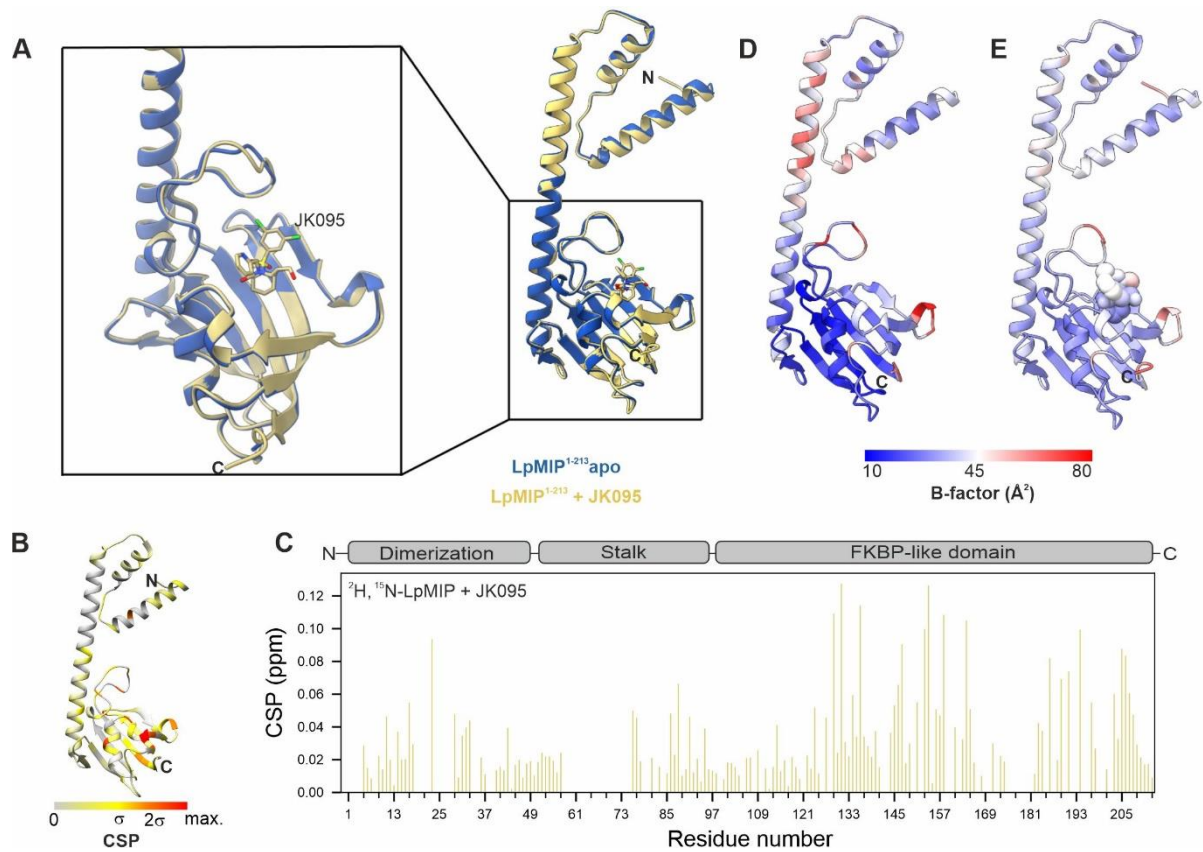

**Fig. 2: Comparison of full-length *LpMIP* in the absence and presence of a bicyclic inhibitor.**

(A) Overlay of *LpMIP* in the absence (blue, PDB: 8BJC) and presence of JK095 (yellow, PDB: 8BJD). The two structures align with a backbone RMSD of 0.349  $\text{\AA}$ . In the zoom of the FKBP-like domain, JK095 is shown as sticks. Non-carbon atom color scheme: blue: N, red: O, yellow: S, green: Cl. Note that the orientation of the zoom has been slightly tilted to better visualize the structural differences in the  $\beta 4/\beta 5$ -loop.

(B, C) Chemical shift changes in  $^2\text{H}$ ,  $^{15}\text{N}$ -labeled *LpMIP* titrated with JK095 mapped on the *LpMIP* crystal structure (B) and per residue (C) with the protein topology shown on top for orientation.

(D, E) Crystallographic B-factors of *LpMIP* in the absence (D) and presence (E) of JK095.

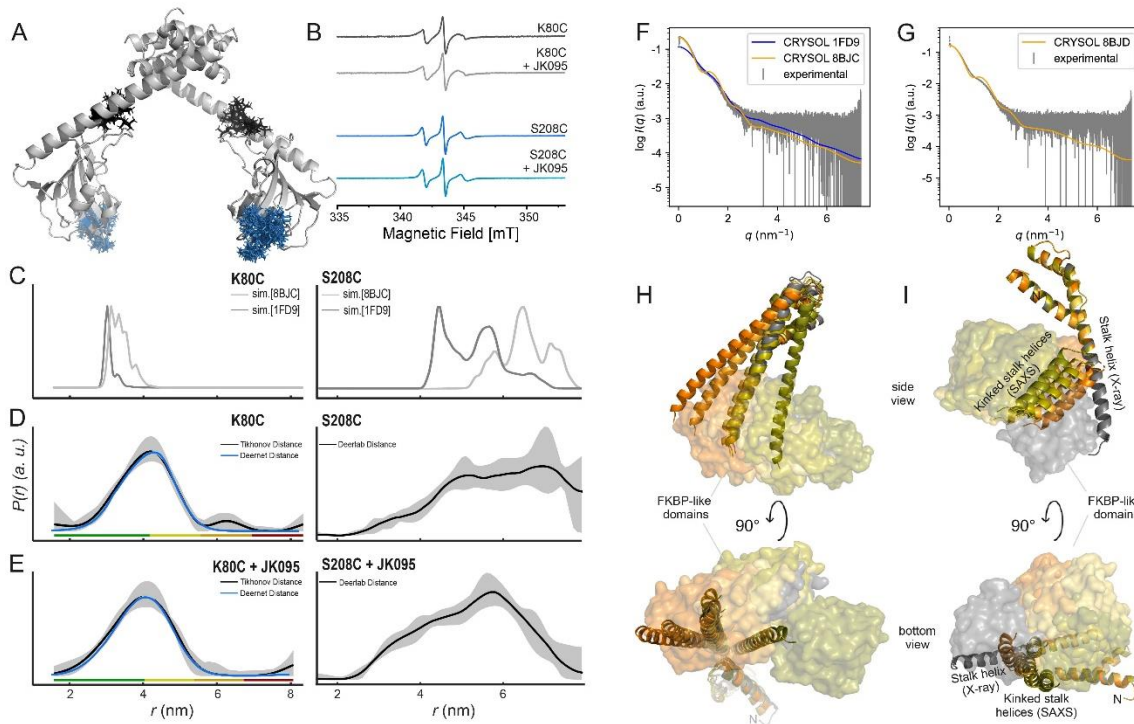

**Fig. 3: Structural dynamics of full-length *LpMIP* in solution.**

(A) Simulated rotamers of proxyl-spin labels attached to *LpMIP* at position K80C (black) or S208C (on PDB: 8BJC using MATLAB-based MMM2022.2 software).

(B) Continuous-wave EPR spectra of spin-labeled *LpMIP* single-cysteine variants.

(C) Predicted interspin distances (sim.) for *LpMIP* K80C (left) and *LpMIP* S208C (right) based on the available

*apo* state crystal structures (PDB-IDs: 8BJC, 1FD9). (D, E) Measured spin label distances using PELDOR/DEER

spectroscopy in the absence (D) and presence (E) of JK095. For *LpMIP* S208C, distances were determined through

a global analysis of 4-pulse and 5-pulse PELDOR data (see Fig. S5). The rainbow code at the bottom indicates

reliability for the probability distribution. (Green: shape, width and mean reliable; yellow: width and mean

reliable, orange: mean reliable; red: not reliable) (F, G) SAXS scattering data for *LpMIP* in the absence (F)

and presence of JK095 (G). The simulated scattering curves (orange and blue traces) based on the available X-ray

structures of *apo LpMIP* (PDB: 8BJC, 1F9J) or with JK095 (PDB: 8BJD) does not match the scattering profile of

the protein in solution after least-square fit to experimental values for  $0.5 \text{ nm}^{-1} < q < 1.5 \text{ nm}^{-1}$ .

(H, I) For a better fit with the experimental SAXS data of *LpMIP* in solution, SREFLEX modeling was carried

out. This yields *LpMIP* structural models with straight (H) and kinked (I) stalk helices. Accordingly, also the

relative orientation of the FKBP like domains (shown as transparent surfaces) changes dramatically. The X-ray

structure (PDB: 8BJC) is shown in grey, representative SREFLEX models in orange hues. For better visualization,

models with straight and kinked helices are shown in separate chains. There are no discernible differences between

the *apo* and JK095-bound state in the *LpMIP* SREFLEX models, thus only the *apo* models are shown (for details

see main text).

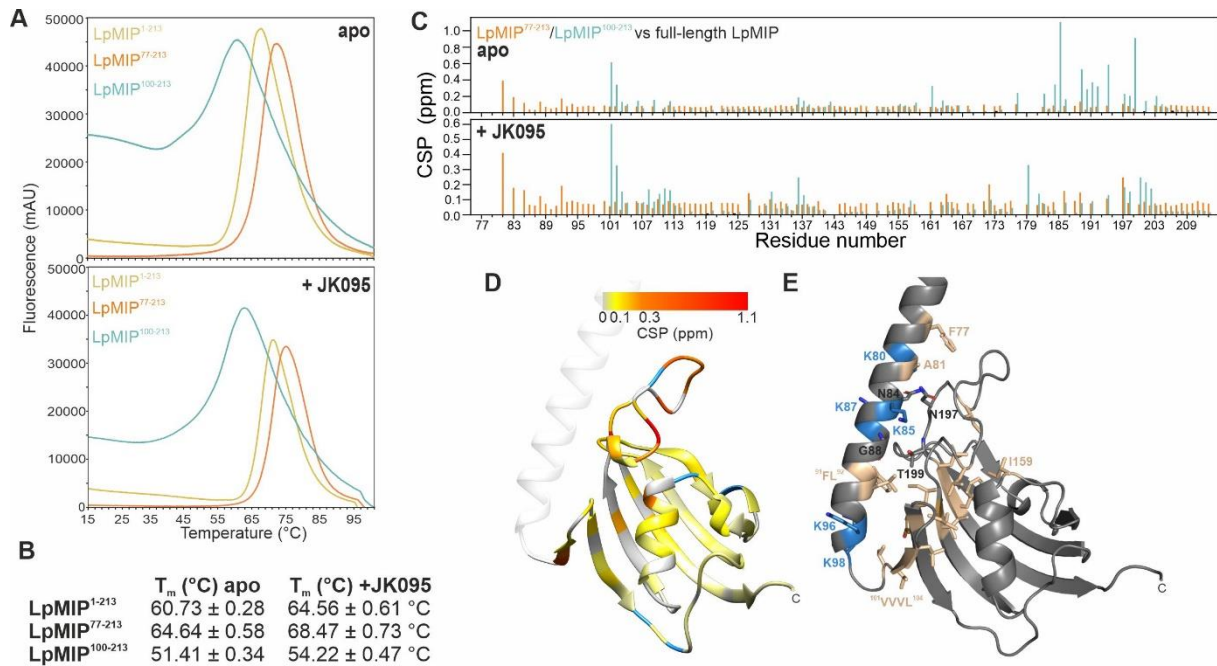

**Fig. 4: Role of the *LpMIP* appendage domains for protein stability and crosstalk with the FKBP-like domain.**

(A) Fluorescence-based melting assay. The melting temperature ( $T_m$ ) for full-length *LpMIP* (yellow) or two deletion constructs (orange, cyan) in the absence (top) or presence of a three-fold molar excess of JK095 (bottom) can be obtained from the inversion point of the upward slope.

(B)  $T_m$  values for the three constructs obtained from the curves shown in (A). Errors are standard deviations from three replicates.

(C) Chemical shift perturbations of the FKBP-like domain resonances of *LpMIP*<sup>77-213</sup> and *LpMIP*<sup>100-213</sup> compared to full-length *LpMIP* (orange and blue, respectively) in the *apo* state (top) and with JK095 (bottom). (D) Chemical shift differences between full-length *LpMIP* and *LpMIP*<sup>100-213</sup> mapped on the FKBP-like domain, residues for which no signal is observed in *LpMIP*<sup>100-213</sup> are colored blue.

(E) Details of hydrophobic interaction network between stalk helix and FKBP-like domain. Hydrophobic residues shown in sand, basic residues in blue, all others in grey. For a better overview, not all sidechains are shown.

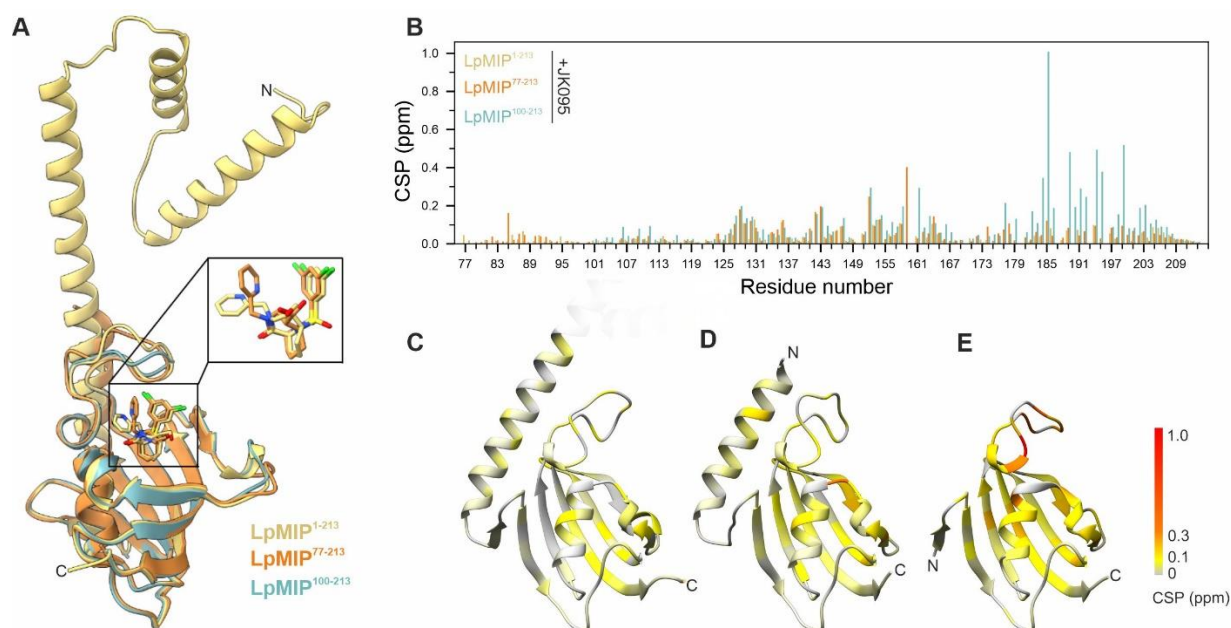

**Fig. 5: Stalk helix affects interaction of *LpMIP* FKBP-like domain with a [4.3.1]-aza-bicyclic sulfonamide inhibitor.**

(A) Overlay of the X-ray crystal structures of *LpMIP*<sup>1-213</sup> (full-length), *LpMIP*<sup>77-213</sup> and *LpMIP*<sup>100-213</sup> co-crystallized with JK095 (PDB IDs: 8BJD, 8BK5, 8BK6). For the *LpMIP*<sup>1-213</sup> homodimer, only one subunit is shown. *LpMIP*<sup>100-213</sup> also crystallizes as a dimer, but no clear density for the ligand was obtained (for details see main text and compare Fig. S8). In the zoom-in, not that in *LpMIP*<sup>77-213</sup>, the hydroxymethyl group of JK095 was found to adopt two different conformations.

(B) Chemical shift perturbations in the FKBP-like domain of <sup>15</sup>N-labeled full-length *LpMIP* (yellow), *LpMIP*<sup>77-213</sup> (orange) and *LpMIP*<sup>100-213</sup> (teal) upon titration with JK095. For better comparison between the three constructs, a unified scale normalized to the maximal shift value in the FKBP-like domain across all three data sets was used. (C-E) JK095-induced chemical shift perturbations within the FKBP-like domain plotted on crystal structures of full-length *LpMIP* (C), *LpMIP*<sup>77-213</sup> (D) and *LpMIP*<sup>100-213</sup> (E).



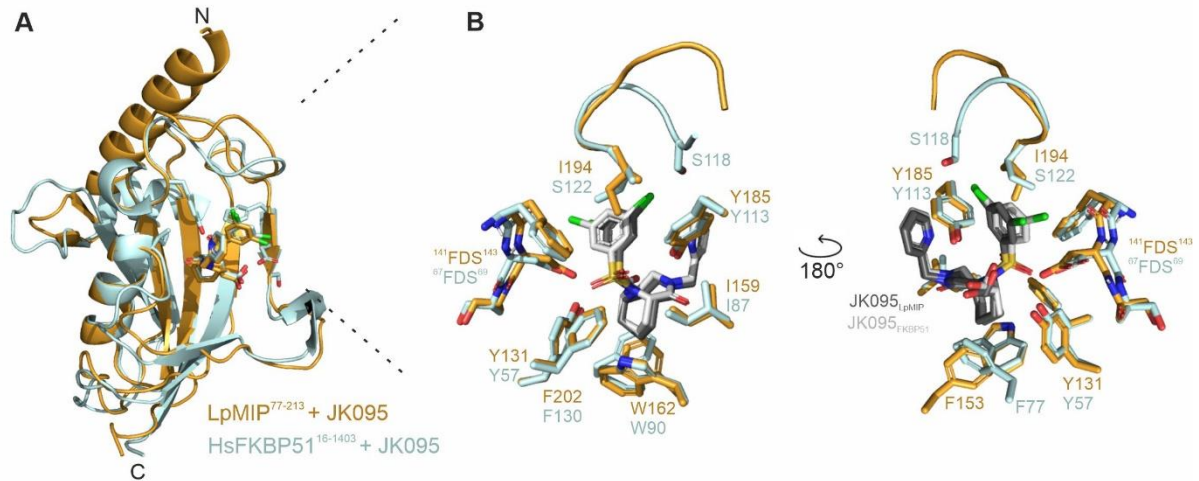

**Fig. 6: Comparison of *LpMIP* and human FKBP51 in complex with the bicyclic inhibitor JK095.**

(A) Overlay of the crystal structures of *LpMIP*<sup>77-213</sup> (PDB: 8BK5, orange) and FKBP51<sup>16-140</sup> (PDB: 50BK, cyan) in complex with the [4.3.1]-aza-bicyclic sulfonamide JK095.

(B) Zoom into the binding site. The relevant interacting residues are shown as sticks. JK095 is shown in dark (*LpMIP*<sup>77-213</sup>) or light (FKBP51<sup>16-140</sup>) grey.

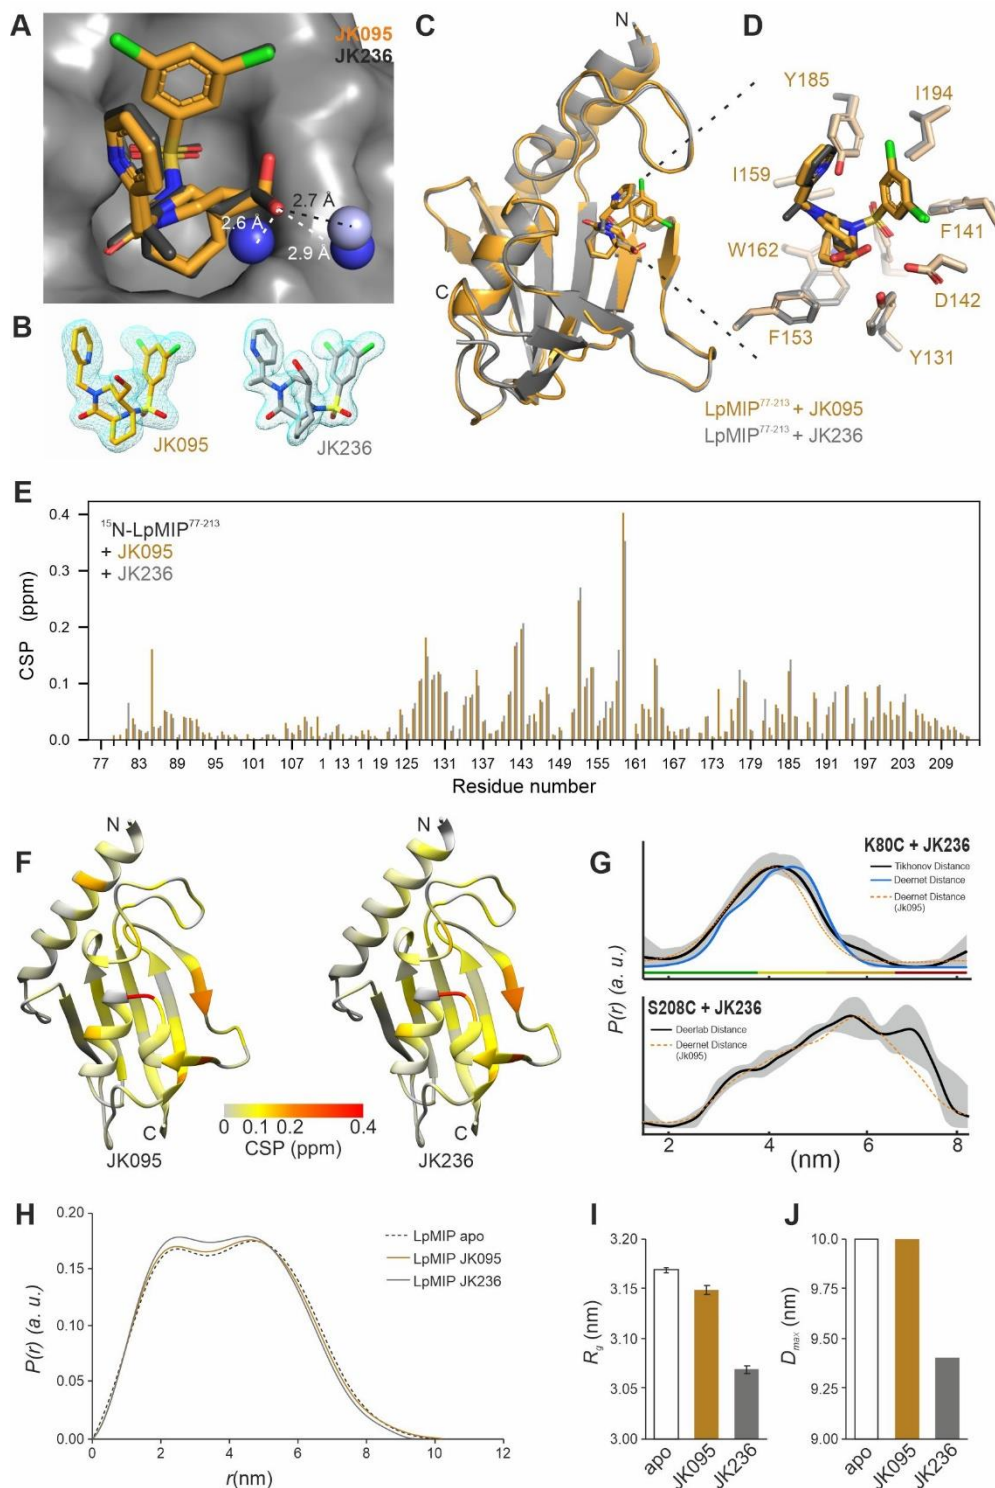

**Fig. 7: Solvent exposed methyl group in [4.3.1]-aza-bicyclic sulfonamide inhibitor improves affinity for *LpMIP*<sup>77-213</sup> through surface water displacement.**

(A) Water molecules in the crystal structures of *LpMIP*<sup>77-213</sup> with JK095 (PDB: 8BK5, dark blue spheres) and JK236 (PDB: 8BJE, light blue sphere). The additional methyl group in JK236 (pointing out of the paper plane) displaces one of the two water molecules that forms a hydrogen bond with the inhibitor's hydroxymethyl group.

Distances between crystallographic water and the inhibitors are indicated by white (JK095) and black (JK236) dashed lines.

**(B)** Electron densities for the two inhibitor molecules in the co-crystal structures with *LpMIP*<sup>77-213</sup>. Note that for JK095, the hydroxymethyl group adopts two conformations.

**(C)** Overlay of the crystal structures of *LpMIP*<sup>77-213</sup> in complex with JK095 (PDB: 8BK5, orange) and its methylated derivative, JK236 (PDB: 8BJE, grey). For a structural comparison of the two molecules, see Scheme 1.

**(D)** Zoom into the binding site. The relevant interacting residues are shown as sticks.

**(E)** Relative NMR chemical shift perturbations (CSP) for JK095 (orange) and JK236 (grey) in comparison to the *apo* protein.

**(F)** Chemical shift perturbation shown in (E) mapped on the X-ray structure of *LpMIP*<sup>77-213</sup> (PDB: 8BK5).

**(G)** Measured spin label distances using PELDOR/DEER spectroscopy for spin-labeled full-length *LpMIP* K80C (top) or S208C (bottom) with JK236. For better comparison, the distance distribution for JK095 (see Fig. 3) is indicated as a dashed orange line (without error margins).

**(H)** SAXS derived real-space pair-distance distribution functions, or  $p(r)$  profiles, calculated for *LpMIP* in the absence (dashed line) or presence of JK095 (orange line) or JK236 (grey line) and

**(I, J)** resulting  $R_g$  and  $D_{max}$  values.  $p(r)$  functions were scaled to an area under the curve value of 1.

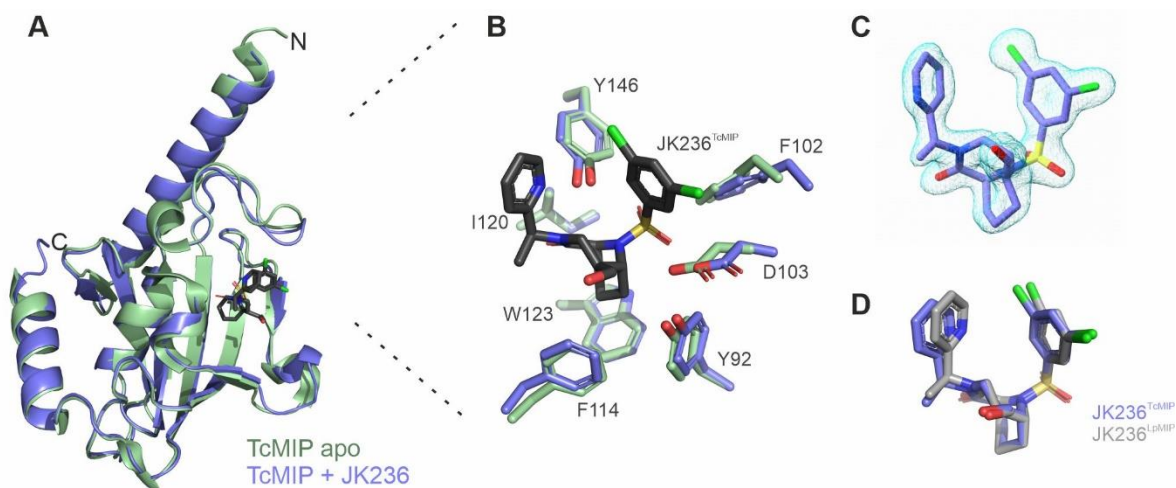

**Fig. 8: *Trypanosoma cruzi* MIP in complex with a [4.3.1]-aza-bicyclic sulfonamide inhibitor.**

(A) Overlay of the crystal structures of *apo* TcMIP (green, PDB: 1JVW) and JK236-bound TcMIP (blue, PDB: 8BK4).

(B) Active site residues in the *apo* or JK236-bound TcMIP. The ligand is shown in black.

(C) Electron density for JK236 bound to TcMIP. The 2Fo-Fc electron density maps are shown in light blue mesh at 3 $\sigma$ .

(D) Comparison of the inhibitor binding stance in TcMIP (blue) and *LpMIP*<sup>77-213</sup> (grey). For details, see also Fig. S9.
